# Supplementary material for: Dalbavancin Population Pharmacokinetic Modeling and Target Attainment Analysis
Source: PubMed Central journal article supplement — Clin Pharmacol Drug Dev. 2019 May 14;9(1):21–31. doi: 10.1002/cpdd.695 (PMC7003773; doi:10.1002/cpdd.695), 2019-05-14
Supplement: CPDD-9-21-s001.pdf [file CPDD-9-21-s001.pdf]

# Dalbavancin Population Pharmacokinetic Modeling and Target Attainment Analysis

Timothy J. Carrothers, Jason T. Chittenden, Ian Critchley

## Supplemental Material

### Structural Model

The structural model was explored using first-, second-, and third compartment models with zero-order input and first-order elimination. The conditional weighted residuals for the 1 (Run 101) and 2 (Run 102) compartment models showed positive bias (under prediction) as time increased. The three-compartment model (Run 103) reduced this bias and provided a significantly better fit than the two-compartment model, with a decrease in Objective Function Value (OFV) of 87 points as shown in **Supplementary Table S1**. These models incorporated IIV on V1, (CL, V2, and Q2 as independent random effects as in the previous popPK model.

Several models were tested for various structures of the random effects. A full block omega (on CL, V1, Q2, V2) improved the two-compartment model by 435 OFV points. Expanding the random effects to all parameters in the three-compartment model (Run 105) improved on the three-compartment model by 155 points, but resulted in high shrinkage for all but volume and clearance random effects. Removing a single random effect from the third-compartment did not improve the model, with removal of V3, 123 points worse (Run 106) and removal of Q3, 3 points worse (Run 107). Random effects on only CL and the three-compartmental volumes

(Run 108) was 11 points better than Run 107, and 8 points better than Run 105 with one and two fewer parameters respectively.

Analysis of the random effect correlation for Run 108 showed high correlation in CL, V1, and V2, with V3 being uncorrelated ( $p < 0.75$ ). Run 109 accounted for this correlation and reduced OFV by 368 points with three additional parameters. Run 110 explored correlation between CL and V1 only, resulting in a 125 point improvement vs Run 108. Run 111 added correlation of V2 and V3 on top of the model in Run 110 with an associated three point improvement on one additional parameter. Run 112 tested correlation just among the volumes and was 62 points better than Run 108. Run 113 tested a full correlation and resulted in a 412 point drop vs Run 108. Run 117 tested a full block matrix on the model of Run 103, finding a worse OFV than the full block model with V3 swapped for V2 (Run 113). Accounting for correlation in all random effects (Run 114) improved the model greatly (412 points vs Run 103), but was not better than Run 113. Dropping V3 and Q3 random effects in the full block omega changed OFV by 105 (Run 115, worse) and -30 points (Run 116, better) respectively. Run 116, Run 113 and Run 114 had the lowest OFV values, but had some convergence problems that indicated over-parameterized omega matrices. Run 109 was only 44 points worse than the full block model for CL+V1+V2+V3 (Run 113), converged with no problems, was stable enough to succeed in the covariance estimate, and was supported by the random effects distribution from the diagonal omega (Run 108).

**Supplementary Table 1: Model Building Trail in the PopPK Structural Model**

| Run | Based on | Description*                             | OFV     | $\Delta$ OFV | Minimization Status | Covariance Step Status |
|-----|----------|------------------------------------------|---------|--------------|---------------------|------------------------|
| 101 | 0        | 1 cpt, Omega(CL, V)                      | 19900.6 |              | Successful          | Successful             |
| 102 | 101      | 2 cpt, Omega(CL, V, Q2, V2)              | 16494.6 | -3406.0      | Successful          | Successful             |
| 103 | 102      | 3 cpt, Omega(CL, V, Q2, V2)              | 16407.7 | -86.9        | Successful          | Successful             |
| 104 | 102      | 2 cpt, Omega(CL + V + Q2 + V2)           | 16059.2 | -435.4       | Successful          | Failed                 |
| 105 | 103      | 3 cpt, Omega(CL, V, Q2, V2, Q3, V3)      | 16253.2 | -154.5       | Successful          | Successful             |
| 106 | 105      | 3 cpt, Omega(CL, V, Q2, V2, Q3)          | 16375.9 | 122.7        | Successful          | Successful             |
| 107 | 105      | 3 cpt, Omega(CL, V, Q2, V2, V3)          | 16256.3 | 3.1          | Successful          | Successful             |
| 108 | 107      | 3 cpt, Omega(CL, V, V2, V3)              | 16245.7 | -10.5        | Successful          | Successful             |
| 109 | 108      | 3 cpt, Omega(CL + V + V2, V3)            | 15877.4 | -368.3       | Successful          | Successful             |
| 110 | 108      | 3 cpt, Omega(CL+V, V2, V3)               | 16120.5 | -125.2       | Successful          | Successful             |
| 111 | 110      | 3 cpt, Omega(CL + V, V2 + V3)            | 16117.3 | -3.3         | Successful          | Successful             |
| 112 | 108      | 3 cpt, Omega(CL, V1 + V2 + V3)           | 16183.7 | -62.1        | Successful          | Successful             |
| 113 | 108      | 3 cpt, Omega(CL + V + V2 + V3)           | 15833.5 | -412.2       | Successful          | Failed                 |
| 114 | 104      | 3 cpt, Omega(CL + V + Q2 + V2 + Q3 + V3) | 15852.4 | -206.8       | Successful          | Failed                 |
| 115 | 114      | 3 cpt, Omega(CL + V + Q2 + V2 + Q3)      | 15957.3 | 104.9        | Failed              | Failed                 |

|     |     |                                        |         |        |            |        |
|-----|-----|----------------------------------------|---------|--------|------------|--------|
| 116 | 114 | 3 cpt, Omega(CL + V +<br>Q2 + V2 + V3) | 15822.4 | -30.0  | Successful | Failed |
| 117 | 103 | 3 cpt, Omega(CL + V +<br>Q2 + V2)      | 15996.9 | -410.8 | Successful | Failed |

---

$\Delta$ OFV=change in objective function value; 3 cpt= three-compartment; CL=clearance; OFV=Objective Function Value; Run=Model Number;

V=volume.

\* Description includes number of compartments and covariance structure, with '+' indicating correlated elements and ',' separating independent elements.

The automated stepwise covariate search proceeded through nine forward steps, as shown in **Supplementary Table S2**. At each forward step, the covariate effect with the largest OFV drop was added if the drop was greater than 6.63. After the ninth forward step, no further covariates provided a large enough drop in OFV to be added to the model. A backward step was completed in which all covariates remain significant with no OFV increase greater than 10.3. No covariates were dropped in the backward step. The resultant model included covariate effects for: CLCR, weight (WT), and albumin (ALB) on CL; WT and ALB on V1; WT, ALB, and AGE on V2; and AGE on V3.

### Supplementary Table S2: Model Building Trail for Stepwise Covariate Model

#### Development

| Step* | Added†   | Starting OFV‡ | New OFV§ | ΔOFV   | P-value¶. |
|-------|----------|---------------|----------|--------|-----------|
| 1     | CLCLCR-5 | 15877.4       | 15704.0  | -173.4 | < 0.0001  |
| 2     | V1WT-5   | 15704.0       | 15616.5  | -87.5  | < 0.0001  |
| 3     | V2AGE-5  | 15616.5       | 15558.7  | -57.8  | < 0.0001  |
| 4     | CLWT-5   | 15558.7       | 15515.2  | -43.5  | < 0.0001  |
| 5     | CLALB-5  | 15515.2       | 15476.0  | -39.2  | < 0.0001  |
| 6     | V2WT-5   | 15476.0       | 15444.9  | -31.2  | < 0.0001  |
| 7     | V2ALB-5  | 15444.9       | 15424.6  | -20.3  | < 0.0001  |
| 8     | V1ALB-5  | 15424.6       | 15403.8  | -20.8  | < 0.0001  |
| 9     | V3AGE-5  | 15403.8       | 15392.0  | -11.8  | 0.0006    |

CLALB=clearance on albumin-5; CLCLCR-5=clearance on creatinine clearance, CLWT-5= clearance on weight, OFV= Objective Function Value; V1ALB-5= volume 1 on albumin; V1WT-5, volume 1 on weight, V2AGE=volume 2 on age, V2ALB-5=volume 2 on albumin; V2WT-5=volume 2 on weight; V3AGE-5=volume 3 on age.

\*Step= Stepwise Covariant Model step

†The covariate was added to the parameter after the step

‡Starting OFV before the step

§The OFV of accepted model

||Change in OFV with the step

¶P-value of the likelihood ratio test for the step.

The resulting Stepwise Covariate Model (SCM) was rerun with the covariance step and output tables as Run1001, but was unstable. The SCM path resulting in Run 1001 indicated at various levels that WT and ALB could be important covariates on V3, so Run 1002 was constructed which includes those variables as well. Run 1002 was stable, but failed the covariance step. The AGE effect on V3 was the last to be added in the SCM and was very close to being eliminated in the backward step. Removal of the AGE on V3 effect was tested in Run 1003 and the model was statistically significantly better. A diagonal omega was tested in Run 1004 to evaluate the correlation of random effects. The correlation structure suggested a correlation between CL and V2, and also between V1 and V3. This covariance structure was tested in Run 1005. A full block omega was tested in Run 1006, but was over-parameterized. Run 1007 and Run 1008 tested removal of AGE on V2 on the original (Run 1003) and new (Run 1005) random effects structures. In neither case could AGE on V2 be neglected, as they resulted in 70 and 82 point increases in OFV, respectively. Run 1005 was taken as the final model based on goodness of fit, estimate precision, and robustness. The models examined in this refinement stage are summarized in **Supplementary Table S3**.

**Supplementary Table S3: Model Building Trail for Covariate Model Refinement**

| Run  | Based on | OFV     | $\Delta$ OFV | Description                                                                              | Minimization Status | Covariance Step Status |
|------|----------|---------|--------------|------------------------------------------------------------------------------------------|---------------------|------------------------|
| 1001 | 108      | 15392.0 |              | CL(CLCR,WT,ALB)<br>V1(WT,ALB) V2(WT, ALB AGE)<br>V3(AGE), Omega(CL + V + V2, V3)         | Failed              | Failed                 |
| 1002 | 1001     | 15386.5 | -5.6         | CL(CLCR,WT,ALB)<br>V1(WT,ALB) V2(WT, ALB, AGE)<br>V3(AGE,WT,ALB), Omega(CL + V + V2, V3) | Successful          | Failed                 |
| 1003 | 1002     | 15395.1 | 8.6          | CL(CLCR,WT,ALB)<br>V1(WT,ALB) V2(WT, ALB, AGE)<br>V3(WT,ALB), Omega(CL + V + V2, V3)     | Successful          | Failed                 |
| 1004 | 1003     | 15726.0 | 330.9        | CL(CLCR,WT,ALB)<br>V1(WT,ALB) V2(WT, ALB, AGE)<br>V3(WT,ALB), Omega(CL, V, V2, V3)       | Successful          | Successful             |
| 1005 | 1004     | 15447.3 | -278.8       | CL(CLCR,WT,ALB)<br>V1(WT,ALB) V2(WT, ALB, AGE)<br>V3(WT,ALB), Omega(CL + V2, V1 + V3)    | Successful          | Successful             |
| 1006 | 1005     | 15344.4 | -102.8       | CL(CLCR,WT,ALB)<br>V1(WT,ALB) V2(WT, ALB, AGE)<br>V3(WT,ALB), Omega(CL + V1 + V2 + V3)   | Successful          | Failed                 |
| 1008 | 1005     | 15517.1 | 69.9         | CL(CLCR,WT,ALB)<br>V1(WT,ALB) V2(WT, ALB)<br>V3(WT,ALB), Omega(CL + V2, V1 + V3)         | Successful          | Successful             |

|      |      |         |      |                                                                                    |            |        |
|------|------|---------|------|------------------------------------------------------------------------------------|------------|--------|
| 1007 | 1003 | 15477.0 | 81.9 | CL(CLCR,WT,ALB)<br>V1(WT,ALB) V2(WT, ALB)<br>V3(WT,ALB), Omega(CL + V +<br>V2, V3) | Successful | Failed |
|------|------|---------|------|------------------------------------------------------------------------------------|------------|--------|

---

ALB=albumin; CL=clearance; CRCL=creatinine clearance, V=volume, WT=weight



**Supplementary Figure S1.** Diagram of the structural model.

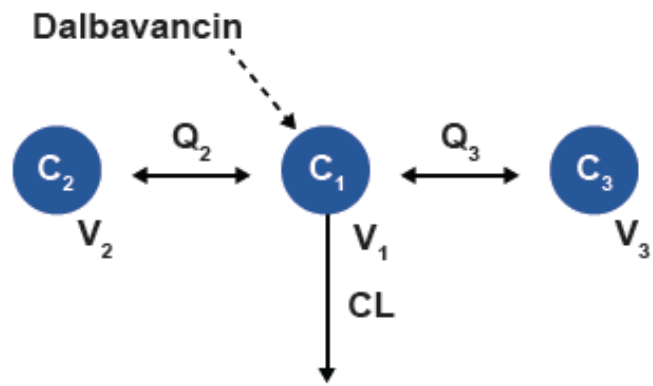

CL=clearance; V=volume.

**Online Supplemental Table. Site numbers, Primary Investigators (PI), Study Sites and Institutional Review Board Names and Addresses for VER001-4, VER001-5, VER001-9 and DUR001-303**

**VER001-4. Primary Investigator, Study site and IRB names and addresses**

| Site # | PI Name               | Study Site(s)                                                                                                                                                                                                                                                | IRB (s)                                                                                                                                                                |
|--------|-----------------------|--------------------------------------------------------------------------------------------------------------------------------------------------------------------------------------------------------------------------------------------------------------|------------------------------------------------------------------------------------------------------------------------------------------------------------------------|
| 02     | Marcus J. Zervos, MD  | William Beaumont Hospital<br>3601 West 13 Mile<br>Royal Oak, MI 48073<br><br>Woodward Hills Nursing Center<br>39312 Woodward Avenue<br>Bloomfield Hills, MI 48304                                                                                            | William Beaumont Hospital<br>Human Investigation Committee<br>3811 W. 13 Mile<br>Royal Oak, MI 48073                                                                   |
| 04     | James S. Tan, MD      | Summa Health System<br>75 Arch Street, Suite 105<br>Akron, OH 44304<br><br>Summa Health System<br>525 East Market Street<br>Akron, OH 44309                                                                                                                  | Summa Health System Hospitals Institutional Review Board<br>Summa Health System<br>525 East Market Street<br>Akron, OH 44309                                           |
| 05     | Issam Raad, MD        | The University of Texas<br>M.D. Anderson Cancer Center<br>1515 Holcombe Boulevard<br>Houston, TX 77030                                                                                                                                                       | The University of Texas M.D. Anderson Cancer Center<br>Institutional Review Board<br>Box 38<br>1515 Holcombe Boulevard<br>Houston, TX 77030                            |
| 06     | Donald R. Graham, MD  | Springfield Clinic<br>1025 South Seventh Street<br>Springfield, IL 62703<br><br>St. John's Hospital<br>800 East Carpenter Street<br>Springfield, IL 62702<br><br>Memorial Medical Center<br>701 North First Street<br>Springfield, IL 62702                  | Fox Commercial Institutional Review Board, Ltd.<br>326 North Seventh Street, Suite 218<br>Springfield, IL 62701                                                        |
| 08     | Arnold L. Lentnek, MD | WellStar Kennestone Hospital<br>677 Church Street<br>Marietta, GA 30060<br><br>WellStar Infectious Disease<br>833 Campbell Hill Street,<br>Suite 410<br>Marietta, GA 30060<br><br>WellStar Windy Hill Hospital<br>2540 Windy Hill Road<br>Marietta, GA 30067 | Western Institutional Review Board<br>3535 7th Avenue, SW<br>Olympia, WA 98502                                                                                         |
| 09     | Chui-Bin Hsiao, MD    | Kaleida Health System<br>Buffalo General Hospital<br>100 High Street<br>Buffalo, NY 14203                                                                                                                                                                    | Health Sciences Institutional Review Board<br>University at Buffalo, The State University at New York<br>3435 Main Street<br>186 Farber Hall<br>Buffalo, NY 14214-3000 |
| 10     | Ian M. Baird, MD      | Riverside Methodist Hospital<br>3535 Olentangy River Road<br>Columbus, Ohio 43214                                                                                                                                                                            | Riverside Methodist Hospital Institutional Review Board<br>3535 Olentangy River Road<br>Columbus, OH 43214                                                             |

|    |                                        |                                                                                                                                                                                                                                                                                                                           |                                                                                                                                                                                                                                         |
|----|----------------------------------------|---------------------------------------------------------------------------------------------------------------------------------------------------------------------------------------------------------------------------------------------------------------------------------------------------------------------------|-----------------------------------------------------------------------------------------------------------------------------------------------------------------------------------------------------------------------------------------|
|    |                                        | <p>Remington-Davis, Inc.<br/>1225 Dublin Road<br/>Columbus, Ohio 43215</p> <p>Riverside Infection Consultants<br/>3545 Olentangy River Road,<br/>Suite 430<br/>Columbus, Ohio 43214</p>                                                                                                                                   |                                                                                                                                                                                                                                         |
| 12 | <a href="#">Rabih O. Darouiche, MD</a> | VAMC Houston<br>2002 Holcombe<br>Houston, TX 77030                                                                                                                                                                                                                                                                        | <p>Baylor College of Medicine Internal Review Board<br/>Office of Research<br/>One Baylor Plaza<br/>Houston, TX 77030-3498</p> <p>Veterans Affairs Research and Development Committee<br/>2002 Holcombe (151)<br/>Houston, TX 77030</p> |
| 27 | <a href="#">Raymond Fang, MD</a>       | 59th Medical Wing (WHMC)<br>2200 Bergquist Drive, Suite 1<br>Lackland AFB, TX 78236-5300                                                                                                                                                                                                                                  | 59th Clinical Research Squadron/MSRPP<br>2200 Bergquist Drive Suite 1<br>Lackland AFB, TX 78236-5300                                                                                                                                    |
| 30 | <a href="#">Louis Sloan, MD</a>        | <p>Baylor University Medical Center<br/>3500 Gaston<br/>Dallas, TX 75246</p> <p>North Texas Infectious Diseases Consultants, PA.<br/>3409 Worth Street<br/>710 Sammons Tower<br/>Dallas, TX 75246</p>                                                                                                                     | Baylor University Medical Center IRB<br>3500 Gaston Avenue<br>Dallas, TX 75246                                                                                                                                                          |
| 35 | <a href="#">Jose Vazquez, MD</a>       | <p>Harper University Hospital<br/>3990 John R<br/>Detroit, MI 48201</p> <p>Detroit Receiving Hospital<br/>4201 St. Antoine<br/>Detroit, MI 48201</p> <p>University Health Center,<br/>4201 St. Antoine<br/>Detroit, MI 48201</p> <p>Rehabilitation Institute on Michigan<br/>261 Mack Boulevard<br/>Detroit, MI 48201</p> | Wayne State University Human Investigation Committee<br>University Health Center<br>Detroit, MI 48201                                                                                                                                   |
| 36 | <a href="#">Thomas DeMarini, MD</a>    | <p>Decatur Hospital<br/>450 North Candler Street<br/>Decatur, GA 30033</p> <p>DeKalb Medical Center<br/>2701 North Decatur Road<br/>Decatur, GA 30033</p> <p>AIM Research/Southeastern Lung Care<br/>2665 North Decatur Road<br/>Suite 530</p>                                                                            | DeKalb Medical Center IRB<br>2701 North Decatur Road<br>Decatur, GA 30033                                                                                                                                                               |

|    |                          |                                                                                                                        |                                                                           |
|----|--------------------------|------------------------------------------------------------------------------------------------------------------------|---------------------------------------------------------------------------|
|    |                          | Decatur, GA 30033                                                                                                      |                                                                           |
| 38 | Annette C. Reboli,<br>MD | Cooper Hospital/UMC<br>One Cooper Plaza<br>Camden, NJ 08103<br><br>Three Cooper Plaza<br>Suite 513<br>Camden, NJ 08103 | Cooper Institutional Review Board<br>One Cooper Plaza<br>Camden, NJ 08103 |

---

**VER001-5. Primary Investigator, Study Sites and IRB Names and Addresses**

| Sit e # | PI Name                               | Study Site(s)                                                                                                                                                       | IRB (s)                                                                                                                                                                                                       |
|---------|---------------------------------------|---------------------------------------------------------------------------------------------------------------------------------------------------------------------|---------------------------------------------------------------------------------------------------------------------------------------------------------------------------------------------------------------|
| 00<br>2 | Allan<br>Seibert, MD                  | Mobile Diagnostic Center at<br>Providence Park<br>6701 Airport Boulevard, Suite A103<br>Mobile, AL 36608                                                            | Providence Hospital Institutional Review Board<br>6801 Airport Blvd<br>Mobile, AL 36608                                                                                                                       |
| 00<br>3 | James<br>DeMaio,<br>MD                | Northwest Medical Specialties<br>1624 South "I" Street, Suite 305<br>Tacoma, WA 98405                                                                               | Quorum Review IRB<br>Medical Dental Bldg.<br>509 Olive Way, Ste. 500<br>Seattle, WA 98101<br><br>Medical Research and Evaluation Committee<br>St Joseph Medical Center<br>1717 S. "J" St.<br>Tacoma, WA 98405 |
| 00<br>4 | Ravi<br>Vemuri, MD                    | Chest, Infectious Diseases, and Critical C<br>Associates, PC<br>1601 NW 114 <sup>th</sup> Street, Suite 347<br>Des Moines, IA 50325                                 | Mercy Medical Center<br>Institutional Review Board<br>1111-6 <sup>th</sup> Avenue<br>Des Moines, IA 50314                                                                                                     |
| 00<br>5 | Ian M.<br>Baird, MD                   | Remington Davis, Inc<br>3545 Olentangy River Road, Suite 430<br>Columbus, Ohio 43214                                                                                | Riverside Methodist Hospital<br>Institutional Review Board<br>3535 Olentangy River Road<br>Columbus, OH 43214                                                                                                 |
| 00<br>6 | Thomas<br>Serena, MD                  | Penn North Center for Advanced Wound Car<br>Warren Surgeons, Inc<br>103 St. Claire Street,<br>Warren, PA 16365                                                      | Warren General Hospital Institutional Review Bo<br>2 Crescent Park West<br>Warren, PA 16365                                                                                                                   |
| 00<br>7 | Donald<br>Graham,<br>MD               | Springfield Clinic Research<br>4B127, 301 North Eight Street,<br>Springfield, IL 62701                                                                              | Fox Commercial Institutional Review Board<br>301 North Sixth Street<br>Suite 320<br>Springfield, IL 62701                                                                                                     |
| 00<br>8 | Kevin<br>Wingert,<br>MD               | Sierra Medical Research, Inc.<br>5066 North Fresno Street, Suite 102,<br>Fresno, CA 93710                                                                           | Western Institutional Review Board<br>P.O. Box 12029<br>3535 7 <sup>th</sup> Avenue S.W.<br>Olympia, WA 98508                                                                                                 |
| 01<br>0 | Luis<br>Jauregui-<br>Peredo, MD       | St. Vincent Mercy Medical Center<br>Infectious / Pulmonary Disease Research<br>Center for Applied Pharmacology<br>2409 Cherry Street, Suite 203<br>Toledo, OH 43608 | Institutional Review Board<br>St. Vincent Mercy Medical Center<br>2213 Cherry Street<br>Toledo, OH 43608                                                                                                      |
| 01<br>1 | Judy Stone,<br>MD                     | Cumberland Memorial Hospital<br>500 Memorial Avenue, Suite 304<br>Cumberland, MD 21502                                                                              | Institutional Review Board<br>Western MD Health System<br>Memorial Hospital Campus<br>600 Memorial Avenue<br>Cumberland, MD 21502                                                                             |
| 01<br>2 | Christopher<br>DeFlicht,<br>MD, FACEP | Penn State Milton S. Hershey Medical C<br>The Pennsylvania State University,<br>500 University Drive,<br>PO Box 850, Room C-2705,<br>Hershey, PA 17033              | Human Subjects Protection Office<br>The Pennsylvania State University<br>The Milton S. Hershey Medical Center<br>500 University Drive<br>Hershey, PA 17033                                                    |

**VER001-9 Primary Investigator and Study Sites Names and Addresses**

| <b>Site #</b> | <b>Investigator Name</b> | <b>Name and Address of Study Site(s)</b>                                                                                                                                                                                                                                                                                                                                                     |
|---------------|--------------------------|----------------------------------------------------------------------------------------------------------------------------------------------------------------------------------------------------------------------------------------------------------------------------------------------------------------------------------------------------------------------------------------------|
| 001           | Philip Giordano, MD      | <p>Orlando Regional Medical Center Laboratory<br/>1414 Kulh Ave or 1414 South Orange Ave<br/>Orlando, FL 32806</p> <p>Dept of Clinical Trials<br/>Orlando Regional Healthcare<br/>86 W. Underwood St., Ste 300<br/>Orlando, FL 32806</p> <p>Orlando Regional Lucerne Hospital<br/>818 Main Lane<br/>Orlando, FL 32806</p>                                                                    |
| 002           | Donald Graham, MD        | <p>Springfield Clinic Infectious Diseases<br/>St. John's Pavilion<br/>301 N. 8<sup>th</sup> Street<br/>Springfield, IL 62701</p> <p>Springfield Clinic<br/>1025 South Seventh Street<br/>Springfield, IL 62703</p> <p>St. John's Hospital<br/>800 E. Carpenter Street<br/>Springfield, IL 62702-5324</p> <p>Memorial Medical Center<br/>701 North First Street<br/>Springfield, IL 62702</p> |

|     |                          |                                                                                                                                                                                                                                                                                                                                                    |
|-----|--------------------------|----------------------------------------------------------------------------------------------------------------------------------------------------------------------------------------------------------------------------------------------------------------------------------------------------------------------------------------------------|
| 003 | Arvind Gupta, MD         | <p>Sacred Heart Hospital<br/>421 Chew Street<br/>Allentown, PA 18102</p> <p>Sacred Heart Hospital Clinical Research Center<br/>450 Chew Street, Ste 204, Sigal Center<br/>Allentown, PA 18102</p>                                                                                                                                                  |
| 004 | Bharat Latthe, MD        | <p>North Belt East Medical Clinic<br/>530 North East, Ste 100<br/>Houston, TX 77060</p> <p>TriQuest Research, Inc.<br/>7447 Harwin Drive, Ste 210B<br/>Houston, TX 77036</p> <p>Foot &amp; Wound Care Institute<br/>17506 Red Oak Drive<br/>Houston, TX 77090</p> <p>Family Medical Clinic<br/>2807 Little York, Ste 110<br/>Houston, TX 77093</p> |
| 005 | William D. O’Riordan, MD | <p>Paradise Valley Hospital<br/>2400 E. 4<sup>th</sup> Street<br/>National City, CA 91950</p>                                                                                                                                                                                                                                                      |
| 006 | Christian D. Schrock, MD | <p>North Memorial Health Care<br/>3300 Oakdale Ave North<br/>Minneapolis, MN 55422</p> <p>Infectious Disease Minneapolis LTD<br/>3366 Oakdale Ave North, Ste 520<br/>Minneapolis, MN 55422</p>                                                                                                                                                     |
| 007 | Thomas Serena, MD        | <p>Warren General Hospital<br/>Two Crescent Park West<br/>Warren, PA 16365</p>                                                                                                                                                                                                                                                                     |
| 008 | Simon Babazadeh, MD      | <p>Crest Clinical Trials, Inc.<br/>3340 W. Ball Road, Suite I<br/>Anaheim, CA 92804</p>                                                                                                                                                                                                                                                            |
| 009 | Ian Baird, MD            | <p>Riverside Methodist Hospital<br/>3535 Olentangy River Road<br/>Columbus, OH 43214</p> <p>Riverside Infection Consultants<br/>3545 Olentangy River Road, Ste 430<br/>Columbus, OH 43214</p> <p>Riverside Internal Medicine<br/>3545 Olentangy River Road, Ste 401<br/>Columbus, OH 43214</p>                                                     |

|     |                            |                                                                                                                                                                                                                                                                                                                                                                                                                                                                                                                                                                                                                   |
|-----|----------------------------|-------------------------------------------------------------------------------------------------------------------------------------------------------------------------------------------------------------------------------------------------------------------------------------------------------------------------------------------------------------------------------------------------------------------------------------------------------------------------------------------------------------------------------------------------------------------------------------------------------------------|
| 010 | Jeffrey Breaux, MD         | <p>Jeffrey G. Breaux, M.D.<br/>781 Colonial Drive<br/>Baton Rouge, LA 70806</p> <p>Gulf Coast Research Assoc., Inc.<br/>2133 Silverside Dr., Ste D<br/>Baton Rouge, LA 70808</p> <p>Lane Memorial Hospital<br/>6300 Main Street<br/>Zachary, LA 70791</p> <p>Wayne D. Gravios, M.D.<br/>Gulf Coast Research Assoc., Inc.<br/>2335 Church Street<br/>Zachary, LA 70791</p> <p>HCS Infusion Network<br/>7566 Picardy Drive<br/>Baton Rouge, LA 70808</p> <p>The Dermatology Clinic<br/>5247 Didesse Drive<br/>Baton Rouge, LA 70808</p> <p>Coursey Urgent Care<br/>13702 Coursey Blvd<br/>Baton Rouge, LA 70817</p> |
| 011 | Jerome Levine, MD          | <p>Hackensack University Medical Center<br/>30 Prospect Avenue<br/>Hackensack, NJ 07601</p> <p>Center for Infectious Diseases<br/>20 Prospect Ave., Suite 507<br/>Hackensack, NJ 07601</p>                                                                                                                                                                                                                                                                                                                                                                                                                        |
| 012 | M. Andrew Levitt, DO       | <p>Alameda County Medical Center<br/>Highland Campus<br/>1411 E. 31<sup>st</sup> Street<br/>Oakland, CA 94602</p>                                                                                                                                                                                                                                                                                                                                                                                                                                                                                                 |
| 013 | L. Scott Larsen, MD        | <p>Bayshore Community Hospital<br/>727 N. Beers Street<br/>Holmdel, NJ 07733</p>                                                                                                                                                                                                                                                                                                                                                                                                                                                                                                                                  |
| 014 | E. Jackson Allison, Jr. MD | <p>VAMC<br/>800 Irving Ave<br/>Syracuse, NY 13210</p>                                                                                                                                                                                                                                                                                                                                                                                                                                                                                                                                                             |
| 015 | Arnold Lentnek, MD         | <p>WellStar Kennestone Hospital<br/>677 Church Steet<br/>Marietta, GA 30060</p> <p>WellStar Infectious Disease, LLC<br/>833 Campbell Hill Street #410<br/>Marietta, GA 30060</p>                                                                                                                                                                                                                                                                                                                                                                                                                                  |



|     |                             |                                                                                                                                                                                                                                                                                                                      |
|-----|-----------------------------|----------------------------------------------------------------------------------------------------------------------------------------------------------------------------------------------------------------------------------------------------------------------------------------------------------------------|
| 016 | Wayne Carey, MD             | McGill University Health Center<br>Royal Victoria Hospital<br>687 Pine Avenue West, M9.30<br>Montreal, Quebec<br>H3A1A1                                                                                                                                                                                              |
| 017 | Luis E. Jauregui-Peredo, MD | St. Vincent Mercy Medical Center<br>2213 Cherry Street<br>Toledo, OH 43608<br><br>Infectious Disease Assoc. of NW Ohio, Inc.<br>2409 Cherry Street, Ste 204<br>Toledo, OH 43608<br><br>ID Clinical Research, Ltd.<br>Infectious/Pulmonary Disease Research<br>2409 Cherry Street, Ste 203<br>Toledo, OH 43608        |
| 018 | Jose E. Vasquez, MD         | Clinical Pharmacology Services<br>6285 E. Flower Avenue<br>Tampa, FL 33617<br><br>605 Medical Care Drive<br>Brandon, FL 33511                                                                                                                                                                                        |
| 019 | Brian O'Neil, MD            | William Beaumont Hospital<br>3601 West 13 Mile Road<br>Royal Oak, MI 48073                                                                                                                                                                                                                                           |
| 020 | Christopher P. Bunce, MD    | St. Vincent Hospitals & Health Services<br>2001 W. 86 <sup>th</sup> Street<br>Indianapolis, Indiana 46260<br><br>Infectious Disease of Indiana, PSC<br>10610 North Pennsylvania, Ste A<br>Indianapolis, IN 46280<br><br>St. Vincent Hospitals & Health Services<br>13500 N. Meridian Street<br>Carmel, Indiana 46032 |
| 021 | Robert Schwartz, MD         | Lee Memorial Hospital<br>2776 Cleveland Avenue<br>Fort Myers, FL 33901<br><br>Associates In Research<br>3677 Central Avenue, Suite D<br>Fort Myers, FL 33901                                                                                                                                                         |
| 022 | Lawrence J. Eron, MD        | Kaiser Permanente<br>3288 Moanalua Road<br>Honolulu, HI 96819                                                                                                                                                                                                                                                        |
| 023 | John M. Embil, MD           | Health Sciences Centre<br>820 Sherbrook Street<br>Winnipeg, Manitoba R3A1R9                                                                                                                                                                                                                                          |

|     |                                     |                                                                                                                                                                                                                                                                                                                                                                        |
|-----|-------------------------------------|------------------------------------------------------------------------------------------------------------------------------------------------------------------------------------------------------------------------------------------------------------------------------------------------------------------------------------------------------------------------|
| 024 | <a href="#">Norman Garrison, MD</a> | <p>Jackson Hospital<br/>1725 Pine Street<br/>Montgomery, AL 36106</p> <p>Industrial Health Services<br/>433 St. Lukes Drive<br/>Montgomery, Al 36117</p> <p>Drug Research &amp; Analysis Corporation<br/>1758 Park Place, Ste 200<br/>Montgomery, AL 36106</p>                                                                                                         |
| 025 | <a href="#">Roger Schechter, MD</a> | <p>Pomerado Hospital<br/>15615 Pomerado Road<br/>Poway, CA 92064</p> <p>Palomar Medical Center<br/>555 E. Valley Parkway<br/>Escondido, CA 92025</p>                                                                                                                                                                                                                   |
| 026 | <a href="#">Brian Tiffany, MD</a>   | <p>Maricopa Medical Center<br/>2601 E. Roosevelt<br/>Phoenix, AZ 85008</p>                                                                                                                                                                                                                                                                                             |
| 027 | <a href="#">Nelson Gantz, MD</a>    | <p>Boulder Community Hospital<br/>1100 Balsam Avenue<br/>Boulder, CO 803034</p> <p>Alpine Clinical Reserch Center<br/>1000 Alpine Avenue #200<br/>Boulder, CO 80304</p> <p>Beacon Clinic<br/>1155 Alpine Avenue, #280<br/>Boulder, CO 80304</p>                                                                                                                        |
| 028 | <a href="#">Gavin X. McLeod, MD</a> | <p>The Stamford Hospital<br/>Shelburne Road at W. Broad Street<br/>Stamford, CT 06902</p>                                                                                                                                                                                                                                                                              |
| 030 | <a href="#">Kenneth Quick, MD</a>   | <p>Clinical Trials Management LLC<br/>203 W. 21<sup>st</sup> Ave<br/>Covington, LA 70433</p> <p>North Lake Foot &amp; Ankle<br/>233 St. Anne Drive, Ste 4<br/>Mandeville, LA 70471</p> <p>Lakeview Regional Medical Center<br/>95 E. Fairway Drive<br/>Covington, LA 70433</p> <p>Lakeview Specialty Center<br/>195 Highland Park Entrance<br/>Covington, LA 70433</p> |
| 032 | <a href="#">Paul J. Haydu, MD</a>   | <p>Pomerado Hospital<br/>15615 Pomerado Road<br/>Poway, CA 92064</p>                                                                                                                                                                                                                                                                                                   |

|     |                                             |                                                                                                                                                                                                                                                                                                                                                           |
|-----|---------------------------------------------|-----------------------------------------------------------------------------------------------------------------------------------------------------------------------------------------------------------------------------------------------------------------------------------------------------------------------------------------------------------|
| 034 | <a href="#">Gisele Wolf-Klein, MD</a>       | Parker Jewish Institute for Health Care & Rehabilitation<br>271-11 76 <sup>th</sup> Avenue<br>New Hyde Park, NY 11040                                                                                                                                                                                                                                     |
| 035 | <a href="#">Ravi Vemuri, MD</a>             | Mercy Medical Center<br>1111-6 <sup>th</sup> Avenue<br>Des Moines, IA 50314-2611<br><br>Chest, Infectious Diseases and Critical Care Assoc<br>1601 NW 114 <sup>th</sup> Street, #347<br>Des Moines, IA 50325-7046                                                                                                                                         |
| 036 | <a href="#">Harold Standiford, MD</a>       | VAMHCS<br>10 N. Greene Street<br>Baltimore, MD 21201<br><br>University of MD Medical Systems<br>22 S. Greene Street<br>Baltimore, MD 21201                                                                                                                                                                                                                |
| 037 | <a href="#">Ahmad Haidar, MD</a>            | Mississippi Medical Research, LLC<br>1016 6 <sup>th</sup> Avenue, Ste B<br>Picayune, MS 39466<br><br>Crosby Memorial Hospital<br>801 Goodyear Blvd<br>Picayune, MS 39466<br><br>Gulf Coast Home Care Picayune<br>306 South Magnolia Street<br>Picayune, MS 39466<br><br>Ahmad A. Haidar, M.D.<br>1016 6 <sup>th</sup> Avenue, Ste C<br>Picayune, MS 39466 |
| 038 | <a href="#">Konstantinos Melahoures, MD</a> | Southland Family & Urgent Care<br>27660 Santa Margarita Parkway<br>Mission Viejo, CA 92691<br><br>Park Pharmacy & Compounding Center<br>250 E. Yale Hoop, Suite C<br>Irvine, CA 92604                                                                                                                                                                     |
| 040 | <a href="#">Mark Harrison, MD</a>           | Lakeland Hospital, St. Joseph<br>1234 Napier Avenue<br>St. Joseph, MI 49085<br><br>Southwestern Medical Clinic<br>6390 Dean's Hill Road<br>Berrien Center, MI 49102                                                                                                                                                                                       |
| 041 | <a href="#">Benjamin Honigman, MD</a>       | University of Colorado Hospital<br>4200 E. 9 <sup>th</sup> Ave<br>Denver, CO 80262                                                                                                                                                                                                                                                                        |

|     |                          |                                                                                                                                                                                                                                                              |
|-----|--------------------------|--------------------------------------------------------------------------------------------------------------------------------------------------------------------------------------------------------------------------------------------------------------|
| 042 | Lawrence C. Parish, MD   | <p>Paddington Test Company, Inc.<br/>1760 Market Street, Suite 301<br/>Philadelphia, PA 19103</p> <p>Shelly's Medication Services<br/>2813 Southampton Road<br/>Philadelphia, PA 19154</p>                                                                   |
| 043 | Carlos Ramirez-Ronda, MD | <p>San Juan VA Medical Center<br/>10 Casia Street (111)<br/>San Juan, PR 00921-3201</p>                                                                                                                                                                      |
| 044 | Walid Khayr, MD          | <p>North Chicago VA Medical Center<br/>3001 Green Bay Road<br/>North Chicago, IL 60064</p>                                                                                                                                                                   |
| 045 | Kenneth Granke, MD       | <p>John D. Dingell VA Medical Center<br/>4646 John R<br/>Detroit, MI 48201</p>                                                                                                                                                                               |
| 047 | Christopher Wong, MD     | <p>Royal Columbian<br/>Owned &amp; Operated by Fraser Health Authority<br/>330 E. Columbia Street<br/>New Westminister, BC V3L3W6</p>                                                                                                                        |
| 049 | Young Kim, MD            | <p>Hahnemann University Hospital<br/>15<sup>th</sup> &amp; Broad Streets<br/>Philadelphia, PA 19102</p>                                                                                                                                                      |
| 050 | Mark Fredrick, MD        | <p>Talbert Medical Group<br/>19066 Magnolia Avenue<br/>Huntington Beach, CA 92646</p> <p>Talbert Medical Group<br/>9930 Talbert Avenue<br/>Fountain Valley, CA 92708</p> <p>Talbert Medical Group<br/>1002 North Fairview Street<br/>Santa Ana, CA 92703</p> |
| 051 | Carol Kauffman, MD       | <p>VA Ann Arbor Healthcare System<br/>Infectious Disease Section 111I<br/>2215 Fuller Road<br/>Ann Arbor, MI 48105</p>                                                                                                                                       |
| 052 | Chiu-Bin Hsiao, MD       | <p>Kaleida Health/Buffalo General Hospital<br/>100 High Street<br/>Buffalo, NY 14203</p>                                                                                                                                                                     |

|     |                      |                                                                                                                                                                                                                                                                                                                                                                                                                                                                                                                                                                                             |
|-----|----------------------|---------------------------------------------------------------------------------------------------------------------------------------------------------------------------------------------------------------------------------------------------------------------------------------------------------------------------------------------------------------------------------------------------------------------------------------------------------------------------------------------------------------------------------------------------------------------------------------------|
| 053 | Larry Cowan, DO      | <p>Genesis Good Samaritan<br/>800 Forest Avenue<br/>Zanesville, OH 43701</p> <p>Genesis Wound Mgmt. Center<br/>860 Bethesda Drive, Building 2<br/>Zanesville, OH 43701</p> <p>Genesis Bethesda<br/>2951 Maple Avenue<br/>Zanesville, OH 43701</p> <p>Surgical Associates of Zanesville<br/>2916 VanGader Drive<br/>Zanesville, OH 43701</p> <p>Doctor's Park<br/>401 Lincoln Park Drive<br/>New Lexington, OH 43764</p> <p>Thornville Family Medical Center<br/>41 Foster Drive<br/>Thornville, OH 43076</p> <p>Dr. Bradley C. Wilson<br/>7756 St. Rt. 37 E<br/>New Lexington, OH 43764</p> |
| 054 | Alex Pareigis, MD    | <p>Medical Arts Associates, LTD<br/>600 John Deere Road, Ste 200<br/>Moline, IL 61265</p> <p>Trinity West Medical Center<br/>2701-17<sup>th</sup> Street<br/>Rock Island, IL 61201-5351</p> <p>Trinity Medical Center<br/>7<sup>th</sup> Street Campus<br/>500 John Deere Road<br/>Moline, IL 61265</p>                                                                                                                                                                                                                                                                                     |
| 055 | Mark Miller, MD      | <p>SMBD-Jewish General Hospital<br/>3755 Cote Ste. Catherine Road<br/>Montreal, QC H3T1E2 Canada</p>                                                                                                                                                                                                                                                                                                                                                                                                                                                                                        |
| 057 | Kathleen Mullane, MD | <p>Loyola University Medical Center<br/>2160 S. First Avenue<br/>Maywood, IL 60153</p>                                                                                                                                                                                                                                                                                                                                                                                                                                                                                                      |
| 058 | Thomas Ferro, MD     | <p>McGuire VAMC<br/>1201 Broad Rock Blvd<br/>Richmond, VA 23249</p> <p>McGuire Research Institute<br/>1201 Broad Blvd<br/>Richmond, VA 23249</p>                                                                                                                                                                                                                                                                                                                                                                                                                                            |

|     |                            |                                                                                                                                                                                                                                                                                                                                                                                                   |
|-----|----------------------------|---------------------------------------------------------------------------------------------------------------------------------------------------------------------------------------------------------------------------------------------------------------------------------------------------------------------------------------------------------------------------------------------------|
| 060 | Jose A. Vazquez, MD        | Harper University Hospital<br>3990 John R Street<br>Detroit, MI 48201<br><br>Detroit Receiving Hospital<br>4201 St. Antoine<br>Detroit, MI 48201<br><br>University Health Center<br>4201 St. Antoine<br>Detroit, MI 48201                                                                                                                                                                         |
| 061 | Bhasker Venkateswaralu, MD | Health Care Partners Medical Group<br>1025 W. Olympic Blvd<br>Los Angeles, CA 90015                                                                                                                                                                                                                                                                                                               |
| 063 | Richard Fetchick, MD       | Southwest Texas Methodist Hospital<br>7700 Floyd Curl Drive<br>San Antonio, TX 78229<br><br>Methodist Specialty & Transplant Hospital<br>8026 Floyd Curl Drive<br>San Antonio, TX 78229                                                                                                                                                                                                           |
| 064 | Michael Wong, MD           | Beth Israel Deaconess Medical Center<br>330 Brookline Avenue<br>Boston, MA 02215                                                                                                                                                                                                                                                                                                                  |
| 065 | David Solomon, MD          | University of Arkansas for Medical Services<br>4301 West Markham, Slot 584<br>Little Rock, AR 72205                                                                                                                                                                                                                                                                                               |
| 066 | Thomas J. Louie, MD        | Foothills Hospital<br>1403 29 <sup>th</sup> Street, N.W.<br>Calgary, Alberta T2N2T9<br><br>Faculty of Medicine<br>University of Calgary<br>3330 Hospital Drive N.W.<br>Calgary, Alberta T2N4N1<br><br>Peter Lougheed Hospital<br>3500 26 <sup>th</sup> Avenue, N.E.<br>Calgary, Alberta T1Y6J4<br><br>Rockyview General Hospital<br>7007- 14 <sup>th</sup> Street S.W.<br>Calgary, Alberta T2V1P9 |
| 067 | Stephenie Long, MD         | Medical Center of Louisiana at New Orleans<br>1532 Tulane Avenue, Pathology Department<br>New Orleans, LA 70112<br><br>University Hospital<br>2021 Perdido Street<br>New Orleans, LA 70112                                                                                                                                                                                                        |
| 068 | Stanley Klein, MD          | Harbor - UCLA Medical Center<br>1000 W. Carson Street<br>Torrance, CA 90509                                                                                                                                                                                                                                                                                                                       |

|     |                                            |                                                                                                                                                                                                                                                                  |
|-----|--------------------------------------------|------------------------------------------------------------------------------------------------------------------------------------------------------------------------------------------------------------------------------------------------------------------|
| 069 | <a href="#">Jack Boghossian, MD</a>        | <p>Clara Maass Medical Center<br/>One Clara Maass Drive<br/>Belleville, NJ 07109</p> <p>Clara Maass Professional Bldg.<br/>5 Franklin Avenue #110<br/>Belleville, NJ 07109</p>                                                                                   |
| 070 | <a href="#">Ellis Tobin, MD</a>            | <p>Albany Medical Center Hospital<br/>43 New Scotland Avenue<br/>Albany, NY 12208</p> <p>Upstate Infectious Disease Associates, LLP<br/>567 New Scotland Ave<br/>Albany, NY 12208</p> <p>Albany Medical College<br/>47 New Scotland Ave<br/>Albany, NY 12208</p> |
| 071 | <a href="#">William K. Lau, MD</a>         | <p>Kapiolani Medical Center at Pali Moi<br/>98-1079 Moanalua Road<br/>Aiea, HI 96701</p> <p>St. Francis West Leeward Health Services<br/>91-2139 Fort Weaver Road, Room 108<br/>Ewa Beach, HI 96706</p>                                                          |
| 072 | <a href="#">Roland Schein, MD</a>          | <p>Department of Veterans Affairs Medical Center<br/>1201 N.W. 16<sup>th</sup> Street<br/>Miami, FL 33125</p>                                                                                                                                                    |
| 073 | <a href="#">Robert Jones, DO</a>           | <p>Berks Infectious Disease Services<br/>301 South 7<sup>th</sup> Avenue, Ste 385<br/>West Reading, PA 19611</p> <p>The Reading Hospital &amp; Medical Center<br/>6<sup>th</sup> Avenue &amp; Spruce Street<br/>West Reading, PA 19611</p>                       |
| 074 | <a href="#">Coleman Rotstein, MD</a>       | <p>Hamilton Health Sciences<br/>Henderson Site<br/>711 Concession Street<br/>Hamilton, Ontario L8V1C3</p> <p>Hamilton Health Sciences<br/>General Site<br/>237 Barton Street East<br/>Hamilton, Ontario L8L 2X2</p>                                              |
| 075 | <a href="#">Charles, C. Bailey Jr., MD</a> | <p>Saddleback Memorial Medical Center<br/>24451 Health Center Drive<br/>Laguna Hills, CA 92653</p> <p>Charles C. Bailey, Jr., M.D. Office<br/>15 Mareblu, Ste 310<br/>Aliso Viejo, CA 92656</p>                                                                  |

|     |                                      |                                                                                                                                                                                                              |
|-----|--------------------------------------|--------------------------------------------------------------------------------------------------------------------------------------------------------------------------------------------------------------|
| 078 | <a href="#">Kathleen Casey, MD</a>   | Jersey Shore University Medical Center<br>1945 Route 33<br>Neptune, NJ 07754                                                                                                                                 |
| 081 | <a href="#">James Tan, MD</a>        | Summa Health System<br>525 East Market Street<br>Akron, OH 44309<br><br>Summa Health System<br>75 Arch Street Suite 105<br>Akron, OH 44304                                                                   |
| 082 | <a href="#">Michael Libman, MD</a>   | Montreal General Hospital<br>1650 Cedar Ave, Room A5-156<br>Montreal, Quebec H3G1A4                                                                                                                          |
| 083 | <a href="#">Frank Lovecchio, DO</a>  | Maricopa Integrated Health System<br>Maricopa Medical Center<br>Department of Emergency Medicine<br>2601 E. Roosevelt<br>Phoenix, AZ 85008                                                                   |
| 200 | <a href="#">Rein Rander, MD</a>      | Eastern Tallinn Central Hospital<br>Ravi 18<br>Tallinn 10138<br>Estonia                                                                                                                                      |
| 201 | <a href="#">Juri Teras, MD</a>       | North Estonian Regional Hospital<br>Mustamae Hospital<br>Sutiste 19<br>Tallinn 13419<br>Estonia<br><br>North Estonian Regional Hospital<br>Department of Skin Diseases<br>Hiiu Str. 39<br>Tallinn<br>Estonia |
| 202 | <a href="#">Tiit Vaasna, MD</a>      | Tartu University Clinics<br>Clinics of Surgery<br>Department of General &Cosmetic/Plastic Surgery<br>L. Puusepa 8<br>Tartu 51014<br>Estonia                                                                  |
| 203 | <a href="#">Dainis Krievins, MD</a>  | P. Stradina Clinical University Hospital<br>Pilsonu 13<br>Riga, LV 1002<br>Latvia                                                                                                                            |
| 204 | <a href="#">Uldis Kupcs, MD</a>      | Valmiera Hospital<br>Jumaras 195<br>Valmiera, LV 4201<br>Latvia                                                                                                                                              |
| 205 | <a href="#">Viesturs Rozitis, MD</a> | Liepajas Central Hospital<br>Slimnicas 25<br>Liepaja, LV 3400<br>Latvia                                                                                                                                      |



|     |                          |                                                                                                                                                  |
|-----|--------------------------|--------------------------------------------------------------------------------------------------------------------------------------------------|
| 206 | Igors Satilovs, MD       | Daugavpils Regional Hospital<br>Vasarnicu 20<br>Daugavpils, LV 5417<br>Latvia                                                                    |
| 207 | Zilvinas Endzinas, MD    | Kauanas Medical University Hospital<br>Eiveniu 2<br>Kauanas, LT 3007<br>Lithuania                                                                |
| 208 | Audrius Gradauskas, MD   | Vilnius City University Hospital<br>Antakalnio 57<br>Vilnius, LT 2040<br>Lithuania                                                               |
| 209 | Raimundas Lunevicius, MD | Vilnius University Emergency Hospital<br>Siltnamiu 29<br>Vilnius, LT 2043<br>Lithuania                                                           |
| 220 | Christiane Bayerl, MD    | Klinik für Dermatologie<br>Venerologie & Allergologie<br>Universitätsklinikum Mannheim<br>Theodor-Kutzer-Ufer 1-3<br>D-68135 Mannheim<br>Germany |
| 250 | Matthew Dryden, MD       | Royal Hampshire County Hospital<br>Winchester<br>Hampshire SO005DG<br>UK                                                                         |
| 251 | Richard Groves, MD       | Chelsea & Westminster Hospital<br>369 Fulham Road<br>London SW109NH<br>UK                                                                        |
| 252 | Mark Wilcox, MD          | Leeds General Infirmary<br>Thoresby Place<br>Off Great Georges Street<br>Leeds LS13EX<br>UK                                                      |
| 253 | Martin Wiselka, MD       | Leicester Royal Infirmary<br>Infirmary Square<br>Leicester<br>LE15WW<br>UK                                                                       |
| 260 | Dante Bassetti, MD       | A.O. Ospedale San Martino e Cliniche Universitarie Conv.<br>Clinica Malattie Infettive<br>Largo Rosanna Benzi n 10<br>16132 Genova<br>Italy      |

**VER001-9 Primary Investigator and IRBs**

| <b>Site #</b> | <b>Investigator Name</b> | <b>Name and Address of Institutional Review Board (IRB)</b>                                                                                         |
|---------------|--------------------------|-----------------------------------------------------------------------------------------------------------------------------------------------------|
| 001           | Philip Giordano, MD      | Orlando Regional Healthcare IRB<br>1414 Kuhl Avenue<br>Orlando, FL 32806                                                                            |
| 002           | Donald Graham, MD        | Fox Commercial IRB LTD<br>326 North Seventh Street, Ste 218<br>Springfield, IL 62701                                                                |
| 003           | Arvind Gupta, MD         | Sacred Heart Hospital IRB<br>421 Chew Street<br>Allentown, PA 18102                                                                                 |
| 004           | Bharat Lathe, MD         | Quorum Review Inc.<br>1601 Fifth Avenue, #1000<br>Seattle, WA 98101                                                                                 |
| 005           | William D. O'Riordan, MD | Paradise Valley Hospital IRB<br>2400 E. 4 <sup>th</sup> Street<br>National City, CA 91950                                                           |
| 006           | Christian D. Schrock, MD | North Memorial Healthcare<br>3300 Oakdale Ave North<br>Minneapolis, MN 55422                                                                        |
| 007           | Thomas Serena, MD        | Warren General Hospital IRB<br>Warren General Hospital<br>Two Crescent Park West<br>Warren, PA 16365                                                |
| 008           | Simon Babazadeh, MD      | Quorum Review Inc.<br>1601 Fifth Avenue, #1000<br>Seattle, WA 98101                                                                                 |
| 009           | Ian Baird, MD            | Riverside Methodist Hospital IRB<br>3535 Olentangy River Road<br>Columbus, OH 43214                                                                 |
| 010           | Jeffrey Breaux, MD       | Quorum Review Inc.<br>1601 Fifth Avenue, #1000<br>Seattle, WA 98101                                                                                 |
| 011           | Jerome Levine, MD        | Hackensack University Medical Center<br>30 Prospect Avenue<br>Hackensack, NJ 07601                                                                  |
| 012           | M. Andrew Levitt, DO     | Robert M. Rodriguez, MD<br>Chair, Human Subjects Committee<br>Alameda County Medical Center<br>1411 E. 31 <sup>st</sup> Street<br>Oakland, CA 94602 |

| <b>Site #</b> | <b>Investigator Name</b>    | <b>Name and Address of Institutional Review Board (IRB)</b>                                                                                                                  |
|---------------|-----------------------------|------------------------------------------------------------------------------------------------------------------------------------------------------------------------------|
| 013           | L. Scott Larsen, MD         | Quorum Review Inc.<br>1601 Fifth Avenue, #1000<br>Seattle, WA 98101                                                                                                          |
| 014           | E. Jackson Allison, Jr. MD  | Human Studies Subcommittee<br>VAMC<br>800 Irving Ave<br>Syracuse, NY 13210                                                                                                   |
| 015           | Arnold Lentnek, MD          | Quorum Review Inc.<br>1601 Fifth Avenue, #1000<br>Seattle, WA 98101                                                                                                          |
| 016           | Wayne Carey, MD             | McGill University Health Center<br>Royal Victoria Hospital<br>Research Ethics Boards<br>687 Pine Avenue West, H4.33<br>Montreal, Quebec<br>H3A1A1                            |
| 017           | Luis E. Jauregui-Peredo, MD | St. Vincent Mercy Medical Center IRB<br>2213 Cherry Street<br>Toledo, OH 43608                                                                                               |
| 018           | Jose E. Vasquez, MD         | Quorum Review Inc.<br>1601 Fifth Avenue, #1000<br>Seattle, WA 98101                                                                                                          |
| 019           | Brian O'Neil, MD            | William Beaumont Hospital<br>Human Investigation Committee<br>3601 West 13 Mile Road<br>Royal Oak, MI 48073                                                                  |
| 020           | Christopher P. Bunce, MD    | St. Vincent Hospitals & Health Services IRB<br>8402 Harcourt Road<br>Indianapolis, IN 46260                                                                                  |
| 021           | Robert Schwartz, MD         | Lee Memorial Health System Institutional Review Committee<br>2776 Cleveland Avenue<br>Fort Myers, FL 33901                                                                   |
| 022           | Lawrence J. Eron, MD        | Kaiser Hawaii IRB<br>501 Alakawa Street, Ste 201<br>Honolulu, HI 96817                                                                                                       |
| 023           | John M. Embil, MD           | Biomedical Research Ethics Board<br>Bannatyne Campus<br>University of Manitoba<br>126-770 Bannatyne Ave<br>Winnipeg, Manitoba R3E0W3                                         |
| 024           | Norman Garrison, MD         | Jackson Hospital IRB<br>1725 Pine Street<br>Montgomery, Al 36106                                                                                                             |
| 025           | Roger Schechter, MD         | Palomar/Pomerado Hospital District<br>Investigational Review Committee<br>c/o Medical Staff Office<br>Palomar Medical Center<br>555 E. Valley Parkway<br>Escondido, CA 92025 |
| 026           | Brian Tiffany, MD           | Maricopa Integrated Health System IRB<br>2601 E. Roosevelt<br>Phoenix, AZ 85008                                                                                              |

| <b>Site #</b> | <b>Investigator Name</b>    | <b>Name and Address of Institutional Review Board (IRB)</b>                                                                                                                   |
|---------------|-----------------------------|-------------------------------------------------------------------------------------------------------------------------------------------------------------------------------|
| 027           | Nelson Gantz, MD            | Quorum Review Inc.<br>1601 Fifth Avenue, #1000<br>Seattle, WA 98101                                                                                                           |
| 028           | Gavin X. McLeod, MD         | The Stamford Hospital IRB<br>Shelburne Road at West Broad Street<br>Stamford, CT 06902                                                                                        |
| 030           | Kenneth Quick, MD           | Quorum Review Inc.<br>1601 Fifth Avenue, #1000<br>Seattle, WA 98101                                                                                                           |
| 032           | Paul J. Haydu, MD           | Palomar/ Pomerado Hospital District<br>Investigational Review Committee<br>c/o Medical Staff Office<br>Palomar Medical Center<br>555 E. Valley Parkway<br>Escondido, CA 92025 |
| 034           | Gisele Wolf-Klein, MD       | Quorum Review Inc.<br>1601 Fifth Avenue, #1000<br>Seattle, WA 98101                                                                                                           |
| 035           | Ravi Vemuri, MD             | Mercy Medical Center Institutional Review Committee<br>1111-6 <sup>th</sup> Avenue<br>Des Moines, IA 50314-2611                                                               |
| 036           | Harold Standiford, MD       | University of Maryland at Baltimore IRB<br>685 West Baltimore Street<br>Baltimore, MD 21201                                                                                   |
| 037           | Ahmad Haidar, MD            | Quorum Review Inc.<br>1601 Fifth Avenue, #1000<br>Seattle, WA 98101                                                                                                           |
| 038           | Konstantinos Melahoures, MD | Quorum Review Inc.<br>1601 Fifth Avenue, #1000<br>Seattle, WA 98101                                                                                                           |
| 040           | Mark Harrison, MD           | Lakeland Hospitals Niles & St. Joseph IRB#1<br>1234 Napier Avenue<br>St. Joseph, MI 49085                                                                                     |
| 041           | Benjamin Honigman, MD       | Colorado Mutiple IRB<br>13001 E. 17 <sup>th</sup> Place<br>PO Box 6508 F490<br>Aurora, CO 80045                                                                               |
| 042           | Lawrence C. Parish, MD      | Quorum Review Inc.<br>1601 Fifth Avenue, #1000<br>Seattle, WA 98101                                                                                                           |
| 043           | Carlos Ramirez-Ronda, MD    | Research & Development Committee<br>Human Studies Subcommittee<br>San Juan VA Medical Center<br>10 Casia Street (111)<br>San Juan, PR 00921-3201                              |
| 044           | Walid Khayr, MD             | Human Studies Subcommittee<br>5 <sup>th</sup> Ave & Roosevelt Road<br>Hines, IL 60141                                                                                         |
| 045           | Kenneth Granke, MD          | Wayne State University Human Investigational Committee<br>University Health Center, 6G<br>4201 St. Antoine Blvd<br>Detroit, MI 48201                                          |

| <b>Site #</b> | <b>Investigator Name</b>   | <b>Name and Address of Institutional Review Board (IRB)</b>                                                                                                   |
|---------------|----------------------------|---------------------------------------------------------------------------------------------------------------------------------------------------------------|
| 047           | Christopher Wong, MD       | Fraser Health Authority<br>Clinical Investigation Committee<br>260 Sherbrooke Street<br>New Westminister, BC V3L3M2                                           |
| 049           | Young Kim, MD              | Office of Research Compliance<br>345 North 15 <sup>th</sup> Street, Mail Stop 444<br>Ste 2105<br>Philadelphia, PA 19102                                       |
| 050           | Mark Fredrick, MD          | Quorum Review Inc.<br>1601 Fifth Avenue, #1000<br>Seattle, WA 98101                                                                                           |
| 051           | Carol Kauffman, MD         | Human Studies Subcommittee<br>VA Ann Arbor Healthcare System<br>2215 Fuller Road<br>Ann Arbor, MI 48015                                                       |
| 052           | Chiu-Bin Hsiao, MD         | Health Sciences Institutional Review Board<br>University of Buffalo<br>The State University of NY<br>150 Parker Hall<br>3435 Main Street<br>Buffalo, NY 14203 |
| 053           | Larry Cowan, DO            | Genesis HealthCare System IRB<br>800 Forest Avenue<br>Zanesville, OH 43701                                                                                    |
| 054           | Alex Pareigis, MD          | Trinity IRB<br>Trinity Medical Center<br>West Campus-Medical Staff Office<br>2701-17 <sup>th</sup> Street<br>Rock Island, IL 61201-5331                       |
| 055           | Mark Miller, MD            | Jack Mendelson, MD<br>Research and Ethics Committee<br>SMBD Jewish General Hospital<br>3755 Cole Ste. Catherine Road<br>Montreal, QC H3T1E3, Canada           |
| 057           | Kathleen Mullane, MD       | Loyola University IRB<br>For the Protection of Human Subjects<br>Medical Center<br>2160 S. First Avenue<br>Maywood, IL 60153                                  |
| 058           | Thomas Ferro, MD           | McGuire IRB<br>1201 Broad Rock Blvd<br>Richmond, VA 23249                                                                                                     |
| 060           | Jose A. Vazquez, MD        | Wayne State University Human Investigation<br>Committee<br>4201 St. Antoine – UHC6G<br>Detroit, MI 48201                                                      |
| 061           | Bhasker Venkateswaralu, MD | Quorum Review Inc.<br>1601 Fifth Avenue, #1000<br>Seattle, WA 98101                                                                                           |
| 063           | Richard Fetchick, MD       | Methodist Healthcare System IRB<br>7700 Floyd Curl Drive<br>San Antonio, TX 78229                                                                             |



| <b>Site #</b> | <b>Investigator Name</b>   | <b>Name and Address of Institutional Review Board (IRB)</b>                                                                                                   |
|---------------|----------------------------|---------------------------------------------------------------------------------------------------------------------------------------------------------------|
| 064           | Michael Wong, MD           | Committee on Clinical Investigations<br>Beth Israel Deaconess Medical Center (F-205)<br>330 Brookline Avenue<br>Boston, MA 02215                              |
| 065           | David Solomon, MD          | Human Research Advisory Committee<br>University of Arkansas for Medical Services<br>4301 West Markham, Slot 636<br>Little Rock, Arkansas 72205                |
| 066           | Thomas J. Louie, MD        | Conjoint Health Ethics Review Board Rm93B<br>Heritage Medical Research Building<br>Faculty of Medicine<br>3330 Hospital Drive N.W.<br>Calgary, Alberta T2N4N1 |
| 067           | Stephenie Long, MD         | IRB<br>Committee on Use of Human Subjects<br>Tidewater Building, #1705<br>1440 Canal Street<br>New Orleans, LA 70112                                          |
| 068           | Stanley Klein, MD          | John F. Wolf Human Subjects Committee<br>1124 W. Carson Street<br>Torrance, CA 90502                                                                          |
| 069           | Jack Boghossian, MD        | Clara Maass Medical Center IRB<br>One Clara Maass Drive<br>Belleville, NJ 07109                                                                               |
| 070           | Ellis Tobin, MD            | Western IRB<br>3535 Seventh Avenue SW<br>Olympia, WA 98502-5010                                                                                               |
| 071           | William K. Lau, MD         | Hawaii Pacific Health IRB<br>55 Merchant Street, 27 <sup>th</sup> Floor<br>Honolulu, HI 96813                                                                 |
| 072           | Roland Schein, MD          | Department of Veterans Affairs Medical Center<br>Human Subjects Subcommittee<br>1201 N.W. 16 <sup>th</sup> Street<br>Miami, FL 33125                          |
| 073           | Robert Jones, DO           | The Reading Hospital & Medical Center IRB<br>6 <sup>th</sup> Avenue & Spruce Street<br>West Reading, PA 19611                                                 |
| 074           | Coleman Rotstein, MD       | Research Ethics Board<br>Henderson Site<br>711 Concession Street<br>Hamilton, Ontario L8V1C3                                                                  |
| 075           | Charles, C. Bailey Jr., MD | Office of Research Administration<br>Memorial Health Services<br>2801 Atlantic Avenue<br>Long Beach, CA 90806                                                 |
| 078           | Kathleen Casey, MD         | Jersey Shore University Medical Center IRB<br>1945 Route 33<br>Neptune, NJ 07754                                                                              |
| 081           | James Tan, MD              | Summa Health System Hospitals Institutional Review Board<br>Summa Health System<br>525 East Market Street<br>Akron, OH 44309                                  |

| <b>Site #</b> | <b>Investigator Name</b> | <b>Name and Address of Institutional Review Board (IRB)</b>                                                                    |
|---------------|--------------------------|--------------------------------------------------------------------------------------------------------------------------------|
| 082           | Michael Libman, MD       | MUHC-MGH Clinical Trial Committee<br>Montreal General Hospital<br>1650 Cedar Ave, Rm A5-156<br>Montreal, Quebec H3G1A4         |
| 083           | Frank Lovecchio, DO      | Maricopa Integrated Health System IRB<br>2601 E. Roosevelt<br>Phoenix, AZ 85008                                                |
| 200           | Rein Rander, MD          | Jaak Polluste<br>Tallinn Medical Research Ethics Committee<br>Hiiu Street 42<br>Tallinn 11619<br>Estonia                       |
| 201           | Juri Teras, MD           | Jaak Polluste<br>Tallinn Medical Research Ethics Committee<br>Hiiu Street 42<br>Tallinn 11619<br>Estonia                       |
| 202           | Tiit Vaasna, MD          | Jaak Polluste<br>Tallinn Medical Research Ethics Committee<br>Hiiu Street 42<br>Tallinn 11619<br>Estonia                       |
| 203           | Dainis Krievins, MD      | Independent Ethics Committee for Investigation of Drugs &<br>Pharmaceutical Products<br>A. Briana 2<br>Riga, LV 1001<br>Latvia |
| 204           | Uldis Kupcs, MD          | Independent Ethics Committee for Investigation of Drugs &<br>Pharmaceutical Products<br>A. Briana 2<br>Riga, LV 1001<br>Latvia |
| 205           | Viesturs Rozitis, MD     | Independent Ethics Committee for Investigation of Drugs &<br>Pharmaceutical Products<br>A. Briana 2<br>Riga, LV 1001<br>Latvia |
| 206           | Igors Satilovs, MD       | Independent Ethics Committee for Investigation of Drugs &<br>Pharmaceutical Products<br>A. Briana 2<br>Riga, LV 1001<br>Latvia |
| 207           | Zilvinas Endzinas, MD    | Lithuania Bioethics Committee<br>Vilnius 33<br>LT-2001<br>Vilnius<br>Lithuania                                                 |
| 208           | Audrius Gradauskas, MD   | Lithuania Bioethics Committee<br>Vilnius 33<br>LT-2001<br>Vilnius<br>Lithuania                                                 |



| <b>Site #</b> | <b>Investigator Name</b> | <b>Name and Address of Institutional Review Board (IRB)</b>                                                                                                                                                                                               |
|---------------|--------------------------|-----------------------------------------------------------------------------------------------------------------------------------------------------------------------------------------------------------------------------------------------------------|
| 209           | Raimundas Lunevicius, MD | Lithuania Bioethics Committee<br>Vilnius 33<br>LT-2001<br>Vilnius<br>Lithuania                                                                                                                                                                            |
| 220           | Christiane Bayerl, MD    | Medizinische Ethikkommission II der Ruprecht-Karls-Universität<br>Heidelberg<br>Chairman Prof. Dr. med. Jens-Peter Striebel<br>Fakultät für Klinische Medizin Mannheim<br>Universitätsklinikum Mannheim<br>Maybachstr. 14-16<br>68169 Mannheim<br>Germany |
| 250           | Matthew Dryden, MD       | Isle of Wight<br>Portsmouth & South East Hampshire Ethics Committee<br>Finchdean House<br>Milton Road<br>Portsmouth PO 36 DP<br>UK                                                                                                                        |
| 251           | Richard Groves, MD       | Riverside Research Ethics Committee<br>Chelsea & Westminster Hospital<br>369 Fulham Road<br>London SW109NH<br>UK                                                                                                                                          |
| 252           | Mark Wilcox, MD          | Leeds (West) Research Ethics Committee<br>6 <sup>th</sup> Floor, Welcome Wing<br>The General Infirmary at Leeds<br>Great Georges Street<br>Leeds LS13EX<br>UK                                                                                             |
| 253           | Martin Wiselka, MD       | Leicestershire Research Ethics Committee (Committee Two)<br>Lakeside House<br>4 Smith Way<br>Grove Park<br>Enderby<br>Leicester LE191SS                                                                                                                   |
| 260           | Dante Bassetti, MD       | Segretaria del Comitato Etico<br>U.O. Affari Generali<br>Azienda Ospedaliera San Martino<br>Largo Rosanna Benzi, 10<br>16132 Genova<br>Italy                                                                                                              |

**DUR001-303 Primary Investigator, Site number and Study Sites Names and Addresses**

| <b>Investigator</b>                                                                                                                                                             | <b>Site Number</b> | <b>Site Name, Address and Phone Number</b>                                                                                                 |
|---------------------------------------------------------------------------------------------------------------------------------------------------------------------------------|--------------------|--------------------------------------------------------------------------------------------------------------------------------------------|
| <b>Bulgaria</b>                                                                                                                                                                 |                    |                                                                                                                                            |
| <b>Marina, Sonya, MD, Assoc. Prof</b><br>Sub-Investigator(s):<br><br>Broshtilova, Valentina, MD<br>Drenovska, Kossara, MD<br>Miteva, Lyubka, Prof.<br>Serafimova, Dimitrina, MD | 800                | UMHAT "Alexandrovska"<br>Clinic of Dermatologic and Venereologic Disease<br>1 Georgi Sofiiski str.<br>1431 Sofia, Bulgaria<br>359887439170 |
| <b>Poromanski, Ivan, MD</b><br>Sub-Investigator(s):<br><br>Markov, Alexander, MD<br>Milev, Yordan, MD<br>Panchovska, Daniela, MD                                                | 801                | UMHATEM "N. I. Pirogov"<br>Clinic of Septic Surgery<br>21 Totleben blvd.<br>1606 Sofia, Bulgaria<br>359887439170                           |
| <b>Gurbev, Georgi, MD, Assoc. Prof</b><br>Sub-Investigator(s):<br><br>Nikolov, Valeri, MD<br>Peshev, Emil, MD<br>Stanishev, Aleksandar, MD<br>Zhivkov, Ivo, MD                  | 802                | FIRST MHAT - Sofia<br>37 Patriarh Evtimiey Blvd<br>1000 Sofia, Bulgaria<br>35928059256                                                     |

| <b>Croatia</b>                                                                                                                                            |     |                                                                                                       |
|-----------------------------------------------------------------------------------------------------------------------------------------------------------|-----|-------------------------------------------------------------------------------------------------------|
| <b>Puljiz, Ivan, MD, PhD</b><br>Sub-Investigator(s):<br><br>Begovac, Josip, MD<br>Topic, Antea, MD<br>Vranjican, Zoran, MD                                | 200 | University Hospital for Infectious Diseases<br>Mirogojska 8<br>Zagreb, Croatia 10000<br>38512826244   |
| <b>Skerk, Visnja, MD, PhD</b><br>Sub-Investigator(s):<br><br>Begovac, Josip, MD<br>Markotic, Alemka, MD<br>Skuhala, Tomislava, MD<br>Vukelic, Dalibor, MD | 201 | University Hospital for Infectious Diseases<br>Mirogojska 8<br>Zagreb, Croatia 10000<br>38512826237   |
| <b>Estonia</b>                                                                                                                                            |     |                                                                                                       |
| <b>Teras, Juri, MD</b><br>Sub-Investigator(s):<br><br>Isand, Karl-Gunnar, MD<br>Umarik, Toomas, MD<br>Urbala, Marko                                       | 252 | North Estonian Medical Centre Foundation (NEMC)<br>19 Sütiste<br>Tallinn, Estonia 13419<br>3725079764 |
| <b>Trudnikov, Andre, MD</b><br>Sub-Investigator(s):<br><br>Johanson, Urmo, MD<br>Oeselg, Airi, MD<br>Timmer, Rita, MD<br>Tonisson, Diana, MD              | 253 | East Tallinn Central Hospital<br>18 Ravi Street<br>Tallinn, Estonia 10318<br>3726207100               |

|                                                                                                                                                                                                                |     |                                                                                                                                                             |
|----------------------------------------------------------------------------------------------------------------------------------------------------------------------------------------------------------------|-----|-------------------------------------------------------------------------------------------------------------------------------------------------------------|
| <p><b>Vaasna, Tiit, MD</b><br/>Sub-Investigator(s):</p> <p>Jyrgenson, Mirje, MD<br/>Murruste, Marko, MD<br/>Nikkolo, Ceith, MD<br/>Seepter, Helmut, MD<br/>Suuman, Jaanus, MD<br/>Tein, Andres, MD</p>         | 251 | <p>Tartu University Clinic<br/>8 L. Puusepa<br/>Tartu, Estonia 51014<br/>3727318245</p>                                                                     |
| <b>Georgia</b>                                                                                                                                                                                                 |     |                                                                                                                                                             |
| <p><b>Gotsadze, Erekle, MD</b><br/>Sub-Investigator(s):</p> <p>Chukhua, Sophio, MD<br/>Kanashvili, Marine, MD<br/>Makhviladze, Manana, Prof<br/>Manjgaladze, Nodar, MD<br/>Zubadalashvili, Nikoloz, MD</p>     | 300 | <p>“Academician Vakhtang Bochorishvili Sepsis and Infectious Pathology Clinic” LTD<br/>16 Al. Kazbegi Avenue<br/>Tbilisi, Georgia 0160<br/>995322371452</p> |
| <p><b>Lomidze, Nodar, Prof</b><br/>Sub-Investigator(s):</p> <p>Chukhua, Sophio, MD<br/>Gugulashvili, Akaki, MD<br/>Manijashvili, Zurab, MD<br/>Saginashvili, Liana, MD<br/>Tsereteli, Ilia, MD</p>             | 301 | <p>Ltd “Academician Nikoloz Kipshidze Central University Clinic”<br/>29 Vazha-Pshavela Avenue<br/>Tbilisi, Georgia 0160<br/>995599589220</p>                |
| <p><b>Tomadze, Gia, Prof</b><br/>Sub-Investigator(s):</p> <p>Arabuli, Nunu, MD<br/>Aspanidze, Erekle, MD<br/>Danelia, Giorgi, MD<br/>Kikalia, Baadur, MD<br/>Kistauri, Khatia, MD<br/>Lagvilava, Anzor, MD</p> | 303 | <p>LTD “Emergency Surgery and Traumatology Center”<br/>9 Tsinandali Street<br/>Tbilisi, Georgia 0144<br/>995599553311</p>                                   |

|                                                                                                                                                                                                    |     |                                                                                                                                                                          |
|----------------------------------------------------------------------------------------------------------------------------------------------------------------------------------------------------|-----|--------------------------------------------------------------------------------------------------------------------------------------------------------------------------|
| <p><b>Vashadze, Jano, MD</b><br/>Sub-Investigator(s):</p> <p>Beridze, Marine, MD<br/>Fotskhverashvili, Giorgi, MD<br/>Goginava, Irakli, MD<br/>Tatvidze, Malvina, MD<br/>Tevdoradze, Davit, MD</p> | 302 | <p>“Imereti Regional Clinical Hospital” LTD<br/>2 Otskheli Street<br/>Kutaisi, Georgia 4600<br/>995598878787</p>                                                         |
| <b>Hungary</b>                                                                                                                                                                                     |     |                                                                                                                                                                          |
| <p><b>Gyulai, Rolland, MD, Phd</b><br/>Sub-Investigator(s):</p> <p>Kinyo, Agnes, MD, PhD</p>                                                                                                       | 354 | <p>Pecsi Tudományegyetem Általános<br/>Orvostudományi Kar, Bor, Nemikortani és<br/>Onkodermatológiai Klinika<br/>Akác utca 1.<br/>Pecs, Hungary 7632<br/>36202520267</p> |
| <p><b>Kemeny, Lajos, MD, Phd</b><br/>Sub-Investigator(s):</p> <p>Csoma, Zsanett, MD<br/>Gal, Grigitta, MD<br/>Manczinger, Mate, MD<br/>Szolnoky, Gyozo, MD</p>                                     | 351 | <p>Szegedi Tudományegyetem<br/>Borgyógyászati és Allergológiai Klinika<br/>Koranyi fasor 6.<br/>Szeged, Hungary 6720<br/>3662545277</p>                                  |
| <p><b>Olah, Tibor, MD, Phd</b><br/>Sub-Investigator(s):</p> <p>Csiszer, Istvan, MD<br/>Csulak, Eszter, MD<br/>Gergely, Mihaly, MD</p>                                                              | 353 | <p>Kaposi Mór Oktató Kórház Általános,<br/>Mellkas és Ersebeszeti Osztály<br/>Tallian Gy. u. 20-32.<br/>Kaposvár, Hungary 7400<br/>36309653090</p>                       |
| <p><b>Remenyik, Eva, MD, Phd</b><br/>Sub-Investigator(s):</p> <p>Erdei, Iren, MD<br/>Juhasz, Istvan, MD<br/>Paragh, Lilla, MD<br/>Szabo, Eva, MD<br/>Torocsik, Daniel, MD</p>                      | 352 | <p>Debreceni Egyetem Klinikai Központ,<br/>Borgyógyászati Klinika<br/>Nagyerdei krt. 98.<br/>Debrecen, Hungary 4012<br/>3652255204</p>                                   |

| <b>Latvia</b>                                                                                                                                                                                    |     |                                                                                                                                        |
|--------------------------------------------------------------------------------------------------------------------------------------------------------------------------------------------------|-----|----------------------------------------------------------------------------------------------------------------------------------------|
| <b>Krastins, Ivars, MD</b><br>Sub-Investigator(s):<br><br>Berezovska, Jekaterina<br>Nalivaiko, Maris, MD                                                                                         | 401 | Liepajas Regional Hospital<br>Anaesthesiology and Intensive Care Unit<br>Slimnicas Street 25<br>Liepaja, Latvia LV-3414<br>37163403248 |
| <b>Krievins, Dainis, MD, PhD, Prof</b><br>Sub-Investigator(s):<br><br>Gardovskis, Andris, MD<br>Lietuvietis, Edvins, MD<br>Lugovska, Svetlana, MD<br>Spaks, Artjoms, MD<br>Strods, Vladislav, MD | 400 | P. Stradins Clinical University Hospital<br>Department of Vascular Surgery<br>Pilsonu Street 13<br>Riga, Latvia LV-1002<br>37129450000 |
| <b>Miscuks, Jurijs, MD</b><br>Sub-Investigator(s):<br><br>Junkurs, Ainars, MD<br>Trups-Kaine, Iveta                                                                                              | 403 | Rezeknes Hospital Surgery department<br>18 Novembra Street 41<br>Rezekne, Latvia LV-4601<br>37129613875                                |
| <b>Novikovs, Nikolajs, MD</b><br>Sub-Investigator(s):<br><br>Oleinikovs, Vladimirs, MD<br>Smolakova, Valentina                                                                                   | 402 | Daugavpils Regional Hospital<br>Surgery department II<br>Vasamicu Street 20<br>Daugavpils, Latvia LV-5417<br>37129403841               |
| <b>Plaudis, Haralds, MD, PhD, Assoc Prof</b><br>Sub-Investigator(s):<br><br>Jezupovs, Arnolds, MD<br>Karetnikova-Irkle, Karina<br>Nikolajenko, Juris, MD                                         | 404 | Riga East Clinical University Hospital<br>Hipokrata Street 2<br>Riga, Latvia LV-1038<br>37167042699                                    |

| <b>Romania</b>                                                                                                                                                                                              |     |                                                                                                                                                                                                           |
|-------------------------------------------------------------------------------------------------------------------------------------------------------------------------------------------------------------|-----|-----------------------------------------------------------------------------------------------------------------------------------------------------------------------------------------------------------|
| <b>Georgescu, Simona Roxana, Prof</b><br>Sub-Investigator(s):<br><br>Benea, Vasile, MD<br>Rusu, Alice, MD<br>Tampa, Mircea, MD                                                                              | 502 | “Dr V. Babes” Clinical Hospital of Infectious Diseases, Dermatology-Venerology Clinic<br>281 Mihal Bravu Road<br>Bucharest, Romania 030303<br>40722293080                                                 |
| <b>Giuglea, Carmen, MD</b><br>Sub-Investigator(s):<br><br>Coman, Crenguta, MD<br>Dumitrache, Serban, MD<br>Popescu, Ioana, MD                                                                               | 503 | “Sf. Ioan” Clinical Emergency Hospital, Plastic and Reconstructive Surgery Department<br>13 Vitan Barzesti Street<br>Bucharest, Romania 042122<br>40723216718                                             |
| <b>Marinescu, Silviu, MD</b><br>Sub-Investigator(s):<br><br>Boiangiu, Ana-Maria, MD<br>Gilgore, Aneta<br>Oporanu, Anca, MD<br>Tatu, Alin, MD                                                                | 500 | “Prof. Dr. Bagdasar-Arseni” Clinical Emergency Hospital, Plastic and Reconstructive Surgery Department<br>12 Berceni Street<br>Bucharest, Romania 041915<br>40723368619                                   |
| <b>Orasan, Remus, Prof</b><br>Sub-Investigator(s):<br><br>Orasan, Meda, MD<br>Roman, Iulia, MD<br>Vultur, Loredana, MD                                                                                      | 501 | Emergency County Hospital Cluj-Napoca, Department of Dermato-Venerology<br>3-5 Clinicilor Street<br>Cluj-Napoca, Cluj County, Romania<br>400006<br>40756059999                                            |
| <b>Russia</b>                                                                                                                                                                                               |     |                                                                                                                                                                                                           |
| <b>Abramov, Igor, MD, DMS, Prof</b><br>Sub-Investigator(s):<br><br>Adamov, Pavel, MD<br>Davtyan, Sona, MD<br>Ignatyev, Sergey, MD<br>Shaydyuk, Oxana, MD<br>Trukhanova, Marina, MD<br>Vasilkov, Dmitriy, MD | 554 | Moscow State Budgetary Healthcare Institution “City Clinical Hospital #15” n.a. O.M. Filatov at Moscow hall<br>Healthcare Department<br>23 Veshnyakovskaya Street<br>Moscow, Russia 111539<br>79037431878 |

|                                                                                                                                                                                                                                                           |            |                                                                                                                                                                                                                     |
|-----------------------------------------------------------------------------------------------------------------------------------------------------------------------------------------------------------------------------------------------------------|------------|---------------------------------------------------------------------------------------------------------------------------------------------------------------------------------------------------------------------|
| <p><b>Apartsin, Konstantin, MD, DMS, Prof</b><br/> Sub-Investigator(s):</p> <p>Ageenko, Maria, MD<br/> Koryakina, Larisa, MD<br/> Sadakh, Maxim, MD<br/> Vybivantseva, Anna, MD</p>                                                                       | <p>557</p> | <p>State Budgetary Healthcare Institution Irkutsk “Respect Sign Awarded” Regional Clinical Hospital<br/> Yubileiny District 100<br/> Irkustk, Russia 664079<br/> 79025767839</p>                                    |
| <p><b>Goryunov, Sergey, MD</b><br/> Sub-Investigator(s):</p> <p>Prvidenstsev, Alexander, MD<br/> Ulyanina, Anastasiya, MD, PhD<br/> Zhidkikh, Natalia, MD<br/> Zhidkikh, Sergey, MD</p>                                                                   | <p>552</p> | <p>Moscow State Budgetary Healthcare Institution “City Clinical Hospital #15” n.a. O.M. Filatov at Moscow hall Healthcare Department<br/> 23 Veshnyakovskaya Street<br/> Moscow, Russia 111539<br/> 74953751490</p> |
| <p><b>Kokorin, Kirill, MD, PhD</b><br/> Sub-Investigator(s):</p> <p>Butko, Boris, MD<br/> Ivanenko, Andrey, MD<br/> Sokolova, Irina, MD</p>                                                                                                               | <p>551</p> | <p>Saint Petersburg State Budgetary Institution of Healthcare “City Hospital #14”<br/> 19 Kosinova Street<br/> St Petersburg, Russia 198099<br/> 79219526875</p>                                                    |
| <p><b>Lenskaya, Liudmila, MD, PhD</b><br/> Sub-Investigator(s):</p> <p>Budankova, Ekaterina, MD<br/> Lutina, Anastasiya, MD<br/> Shepeleva, Evgeniya, MD, PhD<br/> Strezh, Julia, MD<br/> Ustyuzhanina, Elena, MD<br/> Varvyanskaya, Natalia, MD, PhD</p> | <p>556</p> | <p>Regional State Autonomous Healthcare Institution “Tomsk Regional Clinical Hospital”<br/> 96 Ivana Chernich<br/> Tomsk, Russia 634063<br/> 73822644301</p>                                                        |



|                                                                                                                                                                                                                               |     |                                                                                                                                                                                                                |
|-------------------------------------------------------------------------------------------------------------------------------------------------------------------------------------------------------------------------------|-----|----------------------------------------------------------------------------------------------------------------------------------------------------------------------------------------------------------------|
| <p><b>Matevosyan, Elena, MD</b><br/>Sub-Investigator(s):</p> <p>Matevosyan, Tigran, MD<br/>Sagdeev, Oleg, MD<br/>Strygina, Irina, MD<br/>Vorontsova, Tatiana, MD</p>                                                          | 555 | <p>State Budgetary Healthcare Institution of Leningrad Region “Vsevolozhsk Clinical Interdistrict Hospital”<br/>20 Koltushskoe shosse<br/>Vsevolozhsk, Leningrad Region, Russia<br/>188643<br/>78137028687</p> |
| <p><b>Shapgina, Lubov, MD, DMS, Prof</b><br/>Sub-Investigator(s):</p> <p>Karpenko, Andrey, MD, PhD<br/>Kuznetsov, Yury, MD, PhD<br/>Loktin, Evgeny, MD, PhD<br/>Plyaskin, Andrey, MD, PhD<br/>Trigolubov, Andrey, MD, PhD</p> | 553 | <p>State Budgetary Healthcare Institution of Novosibirsk Region “City Clinical Hospital #2”<br/>21 Polzunova str<br/>Novosibirsk, Russia 630051<br/>73832790165</p>                                            |
| <p><b>Serbia</b></p>                                                                                                                                                                                                          |     |                                                                                                                                                                                                                |
| <p><b>Djordjevic, Mirjana Aleksic, MD</b><br/>Sub-Investigator(s):</p> <p>Cvjetkovic, Dejan, MD<br/>Golusin, Zoran, MD<br/>Mikic, Sandra, MD<br/>Petric, Vedrana, MD</p>                                                      | 602 | <p>Clinical Centre of Vojvodina, Clinic for Infectious Diseases<br/>Hajduk Veljkova 1-9<br/>Novi Sad, Serbia 21000<br/>38121420687</p>                                                                         |
| <p><b>Dulovic, Olga, MD, Prof</b><br/>Sub-Investigator(s):</p> <p>Popovic, Natasa, MD<br/>Urosevic, Aleksandar, MD</p>                                                                                                        | 601 | <p>Clinical Centre of Serbia, Clinic for Infectious and Tropical Disease<br/>Bulevar oslobođenja 16<br/>Belgrade, Serbia 11000<br/>3811122684358</p>                                                           |
| <p><b>Karanikolic, Aleksandar, MD, PhD</b><br/>Sub-Investigator(s):</p> <p>Djordjevic, Nebojsa, MD<br/>Karanikolic, Vesna, MD<br/>Mihajlovic, Dragan, MD<br/>Petrovic, Jasmina, MD</p>                                        | 603 | <p>Clinical Centre Nis, Clinic for General Surgery<br/>Bulevar dr Zorana Djindjicll<br/>Nis, Serbia 18000<br/>38118595604</p>                                                                                  |

|                                                                                                                                                                                                              |     |                                                                                                                                                            |
|--------------------------------------------------------------------------------------------------------------------------------------------------------------------------------------------------------------|-----|------------------------------------------------------------------------------------------------------------------------------------------------------------|
| <b>Kovacevic, Bojan, MD, Prof</b><br>Sub-Investigator(s):<br><br>Cuk, Valdimir, MD<br>Cuk, Vladica, MD<br>Ristic, Danica<br>Scepanovic, Milena, MD                                                           | 600 | Clinical Hospital Centre Zvezdara<br>Dimitrija Tucovica 161<br>Belgrade, Serbia 11000<br>381113810413                                                      |
| <b>South Africa</b>                                                                                                                                                                                          |     |                                                                                                                                                            |
| <b>de Jong, Douwe Marcus, MD</b><br>Sub-Investigator(s):<br><br>Brink, Josephus Daniel<br>Musungaie, Dany Badibanga, MD                                                                                      | 759 | Jongaie Research, Medicross Pretoria<br>West, 1st Floor<br>551 WF Nkomo Street<br>Pretoria West, Pretoria 0183, South Africa<br>27123275546                |
| <b>Dindar, Fareed Suliman, MD</b><br>Sub-Investigator(s):<br><br>Dindar, Haroon, MD<br>Dindar, Sulaiman, MD                                                                                                  | 756 | Dr. Fareed Suliman Dindar<br>104 Breytenbach Street<br>Breyten, Mpumalanga 2330, South Africa<br>27178613219                                               |
| <b>Du Plessis, Herman, MD, Prof</b><br>Sub-Investigator(s):<br><br>Bezuidenhout, Abraham, MD<br>Heystek, Marthinus Johannes, MD<br>Jackson, Brandon Spencer, MD<br>Jeske, Christian, MD<br>Kirsten, Mari, MD | 753 | Dept of Surgery, Steve Biko Academic<br>Hospital<br>Comer Malan and Steve Biko Streets,<br>Room 71137<br>Gezina, Pretoria South Africa 0084<br>27123542096 |
| <b>Fourie, Jan, MD</b><br>Sub-Investigator(s):<br><br>Maduna, Theodora Zanele<br>Ramdharee, Sanil Ranjit, MD                                                                                                 | 752 | Dr. J. Fourie Medical Centre<br>58 Ann Street<br>Dundee, KwaZulu-Natal,<br>3000 South Africa<br>27342182092                                                |

|                                                                                                                                                                                                             |     |                                                                                                                                                                                                   |
|-------------------------------------------------------------------------------------------------------------------------------------------------------------------------------------------------------------|-----|---------------------------------------------------------------------------------------------------------------------------------------------------------------------------------------------------|
| <p><b>Gani, Mashra, MD</b><br/>Sub-Investigator(s):</p> <p>Ngcakani, Nomangesi Judith, MD<br/>Seedat, Saadiya Mohamed, MD</p>                                                                               | 758 | <p>Global Clinical Trials, GCT-Mercantile<br/>Primecure Medicentre<br/>C/o Durban and Kempston Roads<br/>Korsten, Port Elizabeth 6014, South<br/>Africa<br/>27414511025</p>                       |
| <p><b>Mitha, Essack, MD</b><br/>Sub-Investigator(s):</p> <p>Chohan, Safiyya, MD<br/>Hassam, Sadiyya</p>                                                                                                     | 755 | <p>Newtown Clinical Research Centre<br/>Suite 3, Newgate Centre<br/>104 Jeppe Street<br/>Newtown, Johannesburg, 2113 South<br/>Africa<br/>27114920336</p>                                         |
| <p><b>Nel, Jeanne, MD</b><br/>Sub-Investigator(s):</p> <p>Basson, Matthys Michiel de Vries,<br/>MD<br/>Nell, Haylene, MD<br/>Njovane, Xolane Wiseman, MD<br/>Pretorius, Maria, MD<br/>Siebert, Mima, MD</p> | 760 | <p>Tiervlei Trial Centre, Basement Floor,<br/>Karl Bremer Hospital<br/>C/o Mike Pienaar Boulevard &amp; Frans<br/>Conradie Avenue<br/>Bellville, Cape Town 7530, South Africa<br/>27219579400</p> |
| <p><b>Tayob, Mohammed Siddique, MD</b><br/>Sub-Investigator(s):</p> <p>Bassa, Ayesha Cassim, MD<br/>Jooma, Yasser, MD<br/>Mathews, Peter Annerley, MD, Prof</p>                                             | 751 | <p>Mzansi Ethical Research Centre<br/>184 Cowen Ntuli Street<br/>Middelburg, Mpumalanga 1055, South<br/>Africa<br/>27132825218</p>                                                                |
| <p><b>van Aswegen, Dina Johanna, MD</b><br/>Sub-Investigator(s):</p> <p>Els, Hendrik Lodewyk, MD<br/>Hyams, David Malcolm, MD<br/>Lottering, Hanlie, MD<br/>Van den Bogaerde, Mary, MD</p>                  | 757 | <p>SCION Clinical Research<br/>34 Bouvardia Street<br/>Lynnwood Ridge, Pretoria 0040, South<br/>Africa<br/>27123610601</p>                                                                        |

|                                                                                                                                                                                                                   |     |                                                                                                                                                                                                                                                                                                                                                                                                                                    |
|-------------------------------------------------------------------------------------------------------------------------------------------------------------------------------------------------------------------|-----|------------------------------------------------------------------------------------------------------------------------------------------------------------------------------------------------------------------------------------------------------------------------------------------------------------------------------------------------------------------------------------------------------------------------------------|
| <p><b>van Dyk, Christo, MD</b><br/>Sub-Investigator(s):</p> <p>Adam, Merle, MD<br/>Jonker, Deon Pieter, MD<br/>Tredoux, Enid Nicolette, MD</p>                                                                    | 754 | <p>Boland Ethical Research Group<br/>1 Quenet Crescent, Stockenström Street<br/>Worcester Western Cape 6850, South<br/>Africa<br/>27233472490</p>                                                                                                                                                                                                                                                                                  |
| <b>Ukraine</b>                                                                                                                                                                                                    |     |                                                                                                                                                                                                                                                                                                                                                                                                                                    |
| <p><b>Barvinska, Anna, MD</b><br/>Sub-Investigator(s):</p> <p>Andriushchenko, Dmytro, MD<br/>Romanchak, Dmytro, MD<br/>Voitovych, Olena, MD<br/>Yaremkenych, Roksolana, MD</p>                                    | 703 | <p>Municipal City Clinical Emergency<br/>Hospital, 2<sup>nd</sup> Surgery Department (City<br/>Purulent Septic Center); Lviv National<br/>Medical University named after Danylo<br/>Halytsky, Department of General<br/>Surgery<br/>9 I. Mykolaychuk Str.<br/>Lviv, Ukraine 79059<br/>380506749772</p>                                                                                                                             |
| <p><b>Datsenko, Oleksiy, MD</b><br/>Sub-Investigator(s):</p> <p>Babets, Olena, MD<br/>Datsenko, Olena, MD<br/>Gluschenko, Yaroslav, MD<br/>Solovey, Andriy, MD</p>                                                | 705 | <p>Municipal Institution of Public Health<br/>“Kharkiv City Clinical Hospital #2”,<br/>Surgery Department #2<br/>197 Moskovskyy Ave<br/>Kharkiv, Ukraine 61037<br/>380577380590</p>                                                                                                                                                                                                                                                |
| <p><b>Kosulnykov, Sergii, MD</b><br/>Sub-Investigator(s):</p> <p>Kravchenko, Kostyantyn, MD<br/>Malyshko, Alina<br/>Polion, Mykyta, MD<br/>Stus, Oksana, MD<br/>Stus, Viktor, MD<br/>Tarnopolskyi, Sergiy, MD</p> | 704 | <p>Municipal Institution “Dnipropetrovsk<br/>Regional Clinical Hospital named after I.I.<br/>Mechnikov”, Surgery Department #2<br/>(Department of Purulent and Septic<br/>Surgery); State Institution<br/>“Dnipropetrovsk Medical Academy of<br/>The Health Ministry of Ukraine”, Chair of<br/>Urology, Operative Surgery and<br/>Topographic Anatomy<br/>14, Zhovtneva sq.<br/>Dnipropetrovsk, Ukraine 49005<br/>380503209125</p> |

|                                                                                                                                                                                                                                     |     |                                                                                                                                                                                                                                                                                                                                  |
|-------------------------------------------------------------------------------------------------------------------------------------------------------------------------------------------------------------------------------------|-----|----------------------------------------------------------------------------------------------------------------------------------------------------------------------------------------------------------------------------------------------------------------------------------------------------------------------------------|
| <p><b>Pyptiuk, Oleksandr, MD, Prof</b><br/>Sub-Investigator(s):</p> <p>Bogush, Anatoliy, MD<br/>Dub, Oleg, MD<br/>Gafiychuk, Sergiy, MD<br/>Pasko, Andriy, MD<br/>Pyptyuk, Volodymyr, MD<br/>Telemukha, Svyatoslav, MD</p>          | 701 | <p>Ivano-Frankivsk Central City Clinical Hospital, Surgery Department; State Higher Educational Institution “Ivano-Frankivsk National Medical University”, Chair of Surgery of Stomatological Faculty<br/>114 Hetmana Mazepy Str<br/>Ivano-Frankivsk, Ukraine, 76025<br/>380342750754</p>                                        |
| <p><b>Shapoval, Sergiy, MD, Prof</b><br/>Sub-Investigator(s):</p> <p>Iakunych, Andrii, MD<br/>Omel'chenko, Vadym, MD<br/>Riazanov, Dmytro, MD, Prof<br/>Smyrnova, Dariya, MD</p>                                                    | 702 | <p>Municipal Institution “City Clinical Hospital #3”, 2<sup>nd</sup> Surgery Department; SI “Zaporizhzhya Medical Academy of Postgraduate Education of HM of Ukraine, Department of Outpatient, Purulent and Septic Surgery and Ultrasound Diagnostics<br/>9 Metalurhiv Ave<br/>Zaporizhzhya, Ukraine 69032<br/>380612131542</p> |
| <p><b>Shevchenko, Vadym, MD</b><br/>Sub-Investigator(s):</p> <p>Alkhimova, Nataliia<br/>Bilostotska, Tetiana<br/>Chernyak, Oleg, MD<br/>Dihtiarenko, Vita<br/>Shevchenko, Olena, MD<br/>Shubina, Liudmyla<br/>Umanets, Oleg, MD</p> | 700 | <p>Municipal Institution “Cherkasy Regional Hospital of Cherkasy Regional Council”, Department of Orthopedics and Traumatology<br/>3 Mendeleyeva Str<br/>Cherkasy, Ukraine 18009<br/>380505152039</p>                                                                                                                            |

|                                                                                                                                                                                                                                                                                                                                                                           |     |                                                                                                                                                                                                                                                                            |
|---------------------------------------------------------------------------------------------------------------------------------------------------------------------------------------------------------------------------------------------------------------------------------------------------------------------------------------------------------------------------|-----|----------------------------------------------------------------------------------------------------------------------------------------------------------------------------------------------------------------------------------------------------------------------------|
| <p><b>Vasylyuk, Sergiy, MD, Prof</b><br/>Sub-Investigator(s):</p> <p>Dmytruk, Olexandr, MD<br/>Galyuk, Volodymyr, MD<br/>Ivanyna, Vasyl, MD<br/>Krymets, Sergiy, MD<br/>Pavliuk, Nataliia, MD<br/>Tkachuk, Oleh, MD</p>                                                                                                                                                   | 706 | <p>Ivano-Frankivsk City Clinical Hospital #1,<br/>Surgery Department; State Higher<br/>Educational Institution "Ivano-Frankivsk<br/>National Medical University", Department<br/>of Surgery #1<br/>34 Mateiky St .<br/>Ivano-Frankivsk, Ukraine 76012<br/>380685412347</p> |
| <b>United States</b>                                                                                                                                                                                                                                                                                                                                                      |     |                                                                                                                                                                                                                                                                            |
| <p><b>Dar, Sadia, MD</b><br/>Sub-Investigator(s):</p> <p>Adamson, Ashley N.<br/>Adamson, Debra S., M.S.<br/>Adamson, William N.<br/>Boyd, Whitney, PA-C<br/>Davey, Tammy<br/>Harris, Beverly Ann, LPN<br/>McKenzie, Robert K., PA-C<br/>Myatt, Benjamin, PharmD<br/>Pollack, Lindsay L., PharmD<br/>Rowe, Heather, MD<br/>Sins, Kristen E.<br/>Sommers, Rebecca, PA-C</p> | 127 | <p>Clinical Research Solutions<br/>515 Stonecrest Pkwy<br/>Suite 110<br/>Smyrna, TN 37167<br/>615-693-4792</p>                                                                                                                                                             |
| <p><b>Eyzaguirre, Robert D., MD</b><br/>Sub-Investigator(s):</p> <p>Abramowitz, Andrea, RPh<br/>Ardanas, Xavier<br/>Romero, Deo Madelone<br/>Tabirara, Noel<br/>Wan, Chok Ping, MD, PhD</p>                                                                                                                                                                               | 106 | <p>Alliance Research<br/>1932 E Anaheim Street<br/>Long Beach, CA 90813<br/>562-366-2554</p>                                                                                                                                                                               |

|                                                                                                                                                                                                                                                                                                                                                                                                            |            |                                                                                                                                            |
|------------------------------------------------------------------------------------------------------------------------------------------------------------------------------------------------------------------------------------------------------------------------------------------------------------------------------------------------------------------------------------------------------------|------------|--------------------------------------------------------------------------------------------------------------------------------------------|
| <p><b>Farley, Brett C., MD</b><br/>Sub-Investigator(s):</p> <p>Bagga-Malhotra, Shagun, MD<br/>Hawn, Mark, RPh<br/>Miao, Hui, MD<br/>Pecci, Pietro, MD</p>                                                                                                                                                                                                                                                  | <p>118</p> | <p>Foundation Research<br/>1541 Florida Ave, #303<br/>Modesto, CA 95350<br/>209-549-9538</p>                                               |
| <p><b>Friedman, Bruce, MD, CNSP, FCCP, FCCM</b><br/>Sub-Investigator(s):</p> <p>Hassan, S. M. Abu Zaheed, MD<br/>Mullins, Robert F., MD<br/>Sprague, Amy, MD</p>                                                                                                                                                                                                                                           | <p>114</p> | <p>Joseph M. Still Burn Center at Doctors Hospital<br/>3675 J. Dewey Gray Circle<br/>Suite 200B<br/>Augusta, GA 30909<br/>706-364-2966</p> |
| <p><b>Giordano, Philip Anthony, MD</b><br/>Sub-Investigator(s):</p> <p>Alfonso, Adalberto, MD<br/>Baker, Sara, MD<br/>Brady, Jason, PharmD, BCPS<br/>Cabrera, Antonio, MD<br/>Kelly, Michael, MD<br/>Ladde, Jay, MD<br/>Mangalat, Neal, MD<br/>Ponder, Christopher, MD<br/>Sernulka, Kristine, RN, BSN, CEN<br/>Smith, Thomas, MD<br/>Thundiyil, Joseph, MD<br/>Weber, Kurt, MD<br/>Willett, Paula, RN</p> | <p>107</p> | <p>Orlando Health<br/>1401 Lucerne Terrace<br/>3rd floor MP 131<br/>Orlando, FL 32806<br/>321-841-3680</p>                                 |

|                                                                                                                                                                                                                                                                           |            |                                                                                                                                                                                                                                                         |
|---------------------------------------------------------------------------------------------------------------------------------------------------------------------------------------------------------------------------------------------------------------------------|------------|---------------------------------------------------------------------------------------------------------------------------------------------------------------------------------------------------------------------------------------------------------|
| <p><b>Green, Sinikka, MD, CPI</b><br/> Sub-Investigator(s):</p> <p>Chu, Hanh, MSN, NP-C<br/> Lee, Kia, NP<br/> Manos, Paul J., DO<br/> Mannis, Steven H., MD FACEP<br/> McManus, Alison J., DNP, FNP-BC<br/> O’Riordan, William D., MD<br/> Overcash, J. Scott, MD</p>    | <p>116</p> | <p>eStudySite<br/> 6367 Alvarado Court<br/> Suite 300<br/> San Diego, CA 92120<br/> 619-567-1550</p>                                                                                                                                                    |
| <p><b>Heller, Barry N., MD</b><br/> Sub-Investigator(s):</p> <p>Cockrell, Robert, MD<br/> Higbee, Carla RN, MSN, FNP-BC<br/> Oviedo, Monica, PA-C, M.M.Sc<br/> Van, Katherine, PharmD, BCPS<br/> Vo, Quang Dinh, MD<br/> Wong, Brenda M., PharmD</p>                      | <p>117</p> | <p>Long Beach Clinical Trials, LLC<br/> 2008 Pacific Avenue<br/> Long Beach, CA 90806<br/> 562-436-4761</p> <p>(previous address)<br/> Long Beach Clinical Trials, LLC<br/> 1043 E1m Ave<br/> Suite 402<br/> Long Beach, CA 90813<br/> 562-436-4761</p> |
| <p><b>Jauregui-Peredo, Luis E., MD</b><br/> Sub-Investigator(s):</p> <p>Aouad, Arlette, MD<br/> Bork, Charles M., RPh<br/> Chinyadza, Tanyanyiwa W., MD<br/> Hurlbert, Jennifer, RN, BSN<br/> Steinhauser, Tina M., RN, BSN,<br/> CCRC<br/> Tilley, Dee Ann, RN, CCRC</p> | <p>111</p> | <p>ID Clinical Research, Ltd.<br/> 2409 Cherry Street<br/> Suite 203<br/> Toledo, OH 43608<br/> 419-251-4919</p>                                                                                                                                        |



|                                                                                                                                                                                                                                                                                                                                                                                                                                                       |            |                                                                                                                          |
|-------------------------------------------------------------------------------------------------------------------------------------------------------------------------------------------------------------------------------------------------------------------------------------------------------------------------------------------------------------------------------------------------------------------------------------------------------|------------|--------------------------------------------------------------------------------------------------------------------------|
| <p><b>Kabler, Heidi A, MD</b><br/>Sub-Investigator(s):</p> <p>Campos, Kathleen, APRN<br/>Francisco, April P., MSN, APN,<br/>FNP-BC<br/>Pratt, Brenda, APRN<br/>Stucke, Sheri A., PhD, APN</p>                                                                                                                                                                                                                                                         | <p>115</p> | <p>eStudySite<br/>6367 Alvarado Court<br/>Suite 300<br/>San Diego, CA 92120<br/>702-410-2970</p>                         |
| <p><b>Keech, Richard, MD</b><br/>Sub-Investigator(s):</p> <p>Cruz, Maylene Dela, RN<br/>De Leon, Josephine, RN, BSN<br/>Hoang, Tram, PharmD<br/>Kim, David<br/>Li, Qing, NP<br/>Ly, Jean, PharmD<br/>Romero, Joel<br/>Villar, Hermilito L., MD</p>                                                                                                                                                                                                    | <p>103</p> | <p>Physician Alliance Research Center<br/>3055 W. Orange Avenue<br/>Suite 204<br/>Anaheim, CA 92804<br/>714-761-2888</p> |
| <p><b>Kingsley, Jeffrey, DO</b><br/><b>(previous) Subich, David C., MD,</b><br/><b>CPI</b><br/>Sub-Investigator(s):</p> <p>Anderson, Andrew, DO, PharmD<br/>Dada, Olasumbo, ANP<br/>Duty, Lauren, PharmD, BCPS<br/>Grant, Rachael<br/>Lakes, Stacey, CPhT<br/>Lockhart Jr., Jesse, PA-C<br/>Miller, Vashti, ANP-BC<br/>Rives, Peter, MD<br/>Senn, Christine, MA, MS, CCRC<br/>Spivey, Stephen, CPhT<br/>Watson, Kandra, MD<br/>Whitman, Bruce, DO</p> | <p>122</p> | <p>Columbus Regional Research Institute<br/>800 Talbotton Road<br/>Columbus, GA 31904<br/>706-596-4894</p>               |

|                                                                                                                                                                                                                                                                                    |            |                                                                                                                                   |
|------------------------------------------------------------------------------------------------------------------------------------------------------------------------------------------------------------------------------------------------------------------------------------|------------|-----------------------------------------------------------------------------------------------------------------------------------|
| <p><b>Lee, Patrick C., MD</b><br/>Sub-Investigator(s):</p> <p>Arreola-Garcia, Cecivon, M.D.<br/>Burkott, Barbara, RN, BSN, CCRP,<br/>CRCP<br/>Germain, Jennifer, RN,<br/>Reyes, Courtney, RN</p>                                                                                   | <p>101</p> | <p>Baystate Medical Center<br/>759 Chestnut St.<br/>Surgery Research, S3613<br/>Springfield, MA 01199<br/>413-794-9227</p>        |
| <p><b>Manos, Paul J., MD FACEP</b><br/>Sub-Investigator(s):</p> <p>Frisbie, John A., MPAS, PA-C<br/>Gill, John C., MD<br/>Mannis, Steven H., MD<br/>McManus, Alison J., DNP, FNP-BD</p>                                                                                            | <p>113</p> | <p>eStudySite<br/>6367 Alvarado Street<br/>Suite 300<br/>San Diego, CA 92120<br/>760-631-3056</p>                                 |
| <p><b>May, Larissa, MD</b><br/>Sub-Investigator(s):</p> <p>Gehring, James, MD<br/>Hatch, Catherine, ARNP<br/>Parenti, David, MD<br/>Parker, Cindy, PharmD<br/>Roberts, Afsoon, MD<br/>Siegel, Marc, MD<br/>Simon, Gary, MD, PhD<br/>Teufel, Karolyn, MD<br/>Zumer, Maria, PA-C</p> | <p>112</p> | <p>The George Washington University<br/>Hospital<br/>2120 L Street NW<br/>Suite 450<br/>Washington, DC 20037<br/>202-741-2920</p> |

|                                                                                                                                                                                                                                                                                                                                        |            |                                                                                                                                     |
|----------------------------------------------------------------------------------------------------------------------------------------------------------------------------------------------------------------------------------------------------------------------------------------------------------------------------------------|------------|-------------------------------------------------------------------------------------------------------------------------------------|
| <p><b>Moran, Gregory John, MD</b><br/> <b>FACEP, FIDSA</b><br/> Sub-Investigator(s):</p> <p>Amii, Ricky, MD<br/> Chiem, Alan, MD<br/> Dyne, Pamela, MD<br/> Lovato, Luis, MD<br/> Lundberg, Scott, MD<br/> Melik-Abrahamian, Fredrick, DO,<br/> FACEP<br/> Seloadji, Paula, PharmD<br/> Taira, Breena, MD<br/> Waxman, Matthew, MD</p> | <p>105</p> | <p>Olive View-UCLA Medical Center<br/> 14445 Olive View Drive<br/> North Annex Building<br/> Sylmar, CA 91342<br/> 818-364-3113</p> |
| <p><b>Morrow, Lee E, MD M. Sc.</b><br/> Sub-Investigator(s):</p> <p>Malesker, Mark, PharmD<br/> McCann, Dustin, DO<br/> Moore, Douglas, MD<br/> Pote, Mary, RRT<br/> Ramelb, Theresa, RRT</p>                                                                                                                                          | <p>123</p> | <p>Creighton University Medical Center<br/> 601 N 30th Street<br/> Suite 3820<br/> Omaha, NE 68131<br/> 402-449-4486</p>            |
| <p><b>O'Mara, Steven G, DO</b><br/> Sub-Investigator(s):</p> <p>Avezzano, Steven D., MD<br/> Brown Jr., Bobby G., DO<br/> Frazer, Henry A., PharmD<br/> Patel, Urmil S., MD<br/> Sample, Richard L., DO</p>                                                                                                                            | <p>110</p> | <p>Drug Research and Analysis Corp.<br/> 1758 Park Place<br/> Suite 200<br/> Montgomery, AL 36106<br/> 334-265-2700</p>             |
| <p><b>Overcash, Jeffrey Scott, MD</b><br/> Sub-Investigator(s):</p> <p>Chu, Hanh, NP-C<br/> Lee, Kia, NP<br/> McManus, Alison, DNP, FNP-BC</p>                                                                                                                                                                                         | <p>104</p> | <p>eStudySite<br/> 6367 Alvarado Court<br/> Suite 300<br/> San Diego, CA 92120<br/> 619-955-5246</p>                                |

|                                                                                                                                                                                                                                                                                                    |            |                                                                                                                            |
|----------------------------------------------------------------------------------------------------------------------------------------------------------------------------------------------------------------------------------------------------------------------------------------------------|------------|----------------------------------------------------------------------------------------------------------------------------|
| <p><b>Pullman, John, MD, FACP</b><br/>Sub-Investigator(s):</p> <p>Chamberlain, David, MD<br/>Rask, Risik, RPh<br/>William-Leber, Erin, PA</p>                                                                                                                                                      | <p>121</p> | <p>Mercury Street Medical Group PLLC<br/>300 W. Mercury Street<br/>Butte, MT 59701<br/>406-723-1375</p>                    |
| <p><b>Rives, Peter A., MD FAAFP</b><br/>Sub-Investigator(s):</p> <p>Davenport, Lisa, PA-C<br/>Kingsley, Jeffrey, DO<br/>Truax, Layton Dexter, RPh<br/>Weeks, Morganne, PA-C</p>                                                                                                                    | <p>125</p> | <p>Southeast Regional Research Group<br/>4849 Paulsen Street<br/>Suite 101<br/>Savannah, GA 31405<br/>912-351-4571</p>     |
| <p><b>Shah, Sanjay B., MD</b><br/>Sub-Investigator(s):</p> <p>Hizkil, Muhammad, MD<br/>Khan, Muhammad A., MD<br/>Naseeruddin, Syed, MD<br/>Puthenpurayil, Siby Thomas<br/>Reynoso, Maria, RMA<br/>Roman, Amarelis, CRC<br/>Vinaipanich, Paul<br/>Vinaipanich, Ruby C., RN, BSN,<br/>CMSRN, OCN</p> | <p>120</p> | <p>Central Florida Internists<br/>3505 Progress Lane<br/>St. Cloud, FL 34769<br/>407-593-5197</p>                          |
| <p><b>Shah, Shaukat A., MD</b><br/>Sub-Investigator(s):</p> <p>Waters, Paul A., MD</p>                                                                                                                                                                                                             | <p>108</p> | <p>St. Joseph's Medical Associates<br/>1805 N. California Street<br/>Suite 201<br/>Stockton, CA 95204<br/>209-988-9801</p> |

|                                                                                                                                                                                                                                                                                                                                                                                            |            |                                                                                                                                             |
|--------------------------------------------------------------------------------------------------------------------------------------------------------------------------------------------------------------------------------------------------------------------------------------------------------------------------------------------------------------------------------------------|------------|---------------------------------------------------------------------------------------------------------------------------------------------|
| <p><b>Slandzicki, Alex J., MD, CMD, CPI</b><br/> Sub-Investigator(s):</p> <p>Adamson, Ashley, CRC<br/> Adamson, Debra, MS<br/> Adamson, William, CRC<br/> Davey, Tammy, CRC<br/> Dhillon, Rennee N., MD<br/> Edwards, Margie M.<br/> Harris, Beverly Ann, LPN<br/> Myatt, Benjamin, PharmD<br/> Pollack, Lindsay Locke, PharmD<br/> Savage, S. Denise, APN<br/> Simon, Allison, FNP-BC</p> | <p>126</p> | <p>Clinical Research Solutions<br/> 377 Riverside Drive, Suite 202<br/> Franklin, TN 37064<br/> 615-577-4117</p>                            |
| <p><b>Ware, David B., MD</b><br/> Sub-Investigator(s):</p> <p>Boudreaux, Rachael M., LPN, CRC<br/> DuBose, Tracie L., FNP-C<br/> Kingston, Gregory P., PharmD, RPh<br/> Miller, Randall P., MD<br/> Richard, Lauren P., LPN, CRC<br/> Savoy, Toby, RT, CRC<br/> Stearns, Zebediah A., MD</p>                                                                                               | <p>119</p> | <p>Horizon Research Group of Opelousas, LLC<br/> 341 Moosa Blvd<br/> Eunice, LA 70535<br/> 337-457-8841</p>                                 |
| <p><b>Zervos, Marcus J., MD</b><br/> Sub-Investigator(s):</p> <p>Grunwald, Jenny, PA<br/> Pabla, Pardeep, PharmD<br/> Reyes, Katherine, MD</p>                                                                                                                                                                                                                                             | <p>109</p> | <p>Henry Ford Health System<br/> 2799 W. Grand Blvd.<br/> CFP-3 Infectious Diseases Department<br/> Detroit, MI 48202<br/> 313-916-7391</p> |

**DUR001-303 Investigator and IRB/ Institutional Ethics Committees (IECs)**

| <b>Investigator<br/>(Last name, First name)</b> | <b>IRBs/IECs Name and Address</b>                                                                                                                                                                                                                                                                                                                                               |
|-------------------------------------------------|---------------------------------------------------------------------------------------------------------------------------------------------------------------------------------------------------------------------------------------------------------------------------------------------------------------------------------------------------------------------------------|
| <b>Bulgaria</b>                                 |                                                                                                                                                                                                                                                                                                                                                                                 |
| Gurbev, Georgi, MD, Assoc. Prof.                | Central: Ethics Committee for Multicenter Trials, 5 Sveta Nedelya Square, 1000 Sofia, Bulgaria<br>Chairperson: Aleksandar Oskar, MD<br>Local: Local Ethics Committee at First MHAT Sofia, 'First Multiprofile Hospital for Active Treatment-Sofia' - EAD , Sofia, 37 Patriarh Evtimiy Blvd, 1154 Sofia, Bulgaria<br>Chairperson: Zlatka Yankova, Assoc Prof                     |
| Marina, Sonya, MD, Assoc. Prof.                 | Central: Ethics Committee for Multicenter Trials, 5 Sveta Nedelya Square, 1000 Sofia, Bulgaria<br>Chairperson: Aleksandar Oskar, MD<br>Local: Local Ethics Committee at UMHAT 'Aleksandrovska,' 'University Multiprofile Hospital for Active Treatment 'Aleksandrovska' EAD, Sofia, 1 Sveti Georgi Sofiiski Street, 1431 Sofia, Bulgaria<br>Chairperson: Zdravko Kamenov, Prof. |

|                        |                                                                                                                                                                                                                                                                                                                                                                                                       |
|------------------------|-------------------------------------------------------------------------------------------------------------------------------------------------------------------------------------------------------------------------------------------------------------------------------------------------------------------------------------------------------------------------------------------------------|
| Poromanski, Ivan, MD   | <p>Central: Ethics Committee for Multicenter Trials, 5 Sveta Nedelya Square, 1000 Sofia, Bulgaria</p> <p>Chairperson: Aleksandar Oskar, MD</p> <p>Local: Local Ethics Committee at UMHATEM 'N.I.Pirogov,' 'University Multiprofile Hospital for Active Treatment and Emergency Medicine N.I.Pirogov' EAD, Sofia, 21 Totleben Blvd., 1606 Sofia, Bulgaria</p> <p>Chairperson: Konstantin Dimov, MD</p> |
| <b>Croatia</b>         |                                                                                                                                                                                                                                                                                                                                                                                                       |
| Puljiz, Ivan, MD, PhD  | <p>Central: Agency for Medical Products and Medical Devices of Croatia, Central Ethics Committee Ksaverska cesta 4, Zagreb, Croatia 10000</p> <p>Chairperson: Dinko Vitezic, MD, PhD</p> <p>Local: Drug Committee, Clinic for Infectious Diseases "Dr. Fran Mihaljevic," Mirogojska 8, 10000 Zagreb, Croatia</p> <p>Chairperson: Bruno Barsic, MD, PhD</p>                                            |
| Skerk, Visnja, MD, PhD | <p>Central: Agency for Medical Products and Medical devices of Croatia, Central Ethics Committee Ksaverska cesta 4, Zagreb, Croatia 10000</p> <p>Chairperson: Dinko Vitezic, MD, PhD</p> <p>Local: Drug Committee, Clinic for Infectious Diseases "Dr. Fran Mihaljevic," Mirogojska 8, 10000 Zagreb, Croatia</p> <p>Chairperson: Bruno Barsic, MD, PhD</p>                                            |
| <b>Estonia</b>         |                                                                                                                                                                                                                                                                                                                                                                                                       |
| Teras, Juri, MD        | <p>Central: Tallinn Medical Research Ethics Committee, Hiiu 42, 11619 Tallinn, Estonia</p> <p>Chairperson: Jaak Polluste, MD</p> <p>Local: N/A</p>                                                                                                                                                                                                                                                    |

|                       |                                                                                                                                                                                                                                                                                            |
|-----------------------|--------------------------------------------------------------------------------------------------------------------------------------------------------------------------------------------------------------------------------------------------------------------------------------------|
| Trudnikov, Andre, MD  | <p>Central: Tallinn Medical Research Ethics Committee, Hiiu 42, 11619 Tallinn, Estonia</p> <p>Chairperson: Jaak Polluste, MD</p> <p>Local: N/A</p>                                                                                                                                         |
| Vaasna, Tiit, MD      | <p>Central: Tallinn Medical Research Ethics Committee, Hiiu 42, 11619 Tallinn, Estonia</p> <p>Chairperson: Jaak Polluste, MD</p> <p>Local: N/A</p>                                                                                                                                         |
| <b>Georgia</b>        |                                                                                                                                                                                                                                                                                            |
| Gotsadze, Erekle, MD  | <p>Central: N/A</p> <p>Local: IEC of “Academician Vakhtang Bochorishvili Sepsis and Infectious Pathology Clinic” LTD, “Academician Vakhtang Bochorishvili Sepsis and Infectious Pathology Clinic” LTD, 16 Kazbegis Avenue, 0160, Tbilisi, Georgia</p> <p>Chairperson: Rodam Turzeladze</p> |
| Lomidze, Nodar, Prof. | <p>Central: N/A</p> <p>Local: IEC of LTD “Academician Nikoloz Kipshidze Central University Clinic” LTD “Academician Nikoloz Kipshidze Central University Clinic” 29 Vazha-Pshavela Ave, 0160, Tbilisi, Georgia</p> <p>Chairperson: Paata Amirkhanashvili</p>                               |
| Tomadze, Gia, Prof.   | <p>Central: N/A</p> <p>Local: IEC of LTD “Emergency surgery and traumatology Center” LTD “Emergency surgery and traumatology Center,” 9 Tsinandali street, 0144, Tbilisi, Georgia</p> <p>Chairperson: Avtandil Megreladze</p>                                                              |
| Vashadze, Jano, MD    | <p>Central: N/A</p> <p>Local: IEC of JSC “Evex Medical Corporation” JSC “Evex Medical Corporation” 2 Otskheli street, 4600, Kutaisi, Georgia</p> <p>Chairperson: Abesalom Abuladze</p>                                                                                                     |



---

**Hungary**

---

Gyulai, Rolland, MD, PhD

Central: Egészségügyi Tudományos Tanács -  
Klinikai Farmakológiai Etikai Bizottság,  
Arany János utca 6-8, Budapest, Hungary  
1051

Chairperson: Zsuzsanna Füst, MD, Prof.

Local: N/A

---

Kemeny, Lajos, MD, PhD

Central: Egészségügyi Tudományos Tanács -  
Klinikai Farmakológiai Etikai Bizottság,  
Arany János utca 6-8, Budapest, Hungary  
1051

Chairperson: Zsuzsanna Füst, MD, Prof.

Local: N/A

---

Olah, Tibor, MD, PhD

Central: Egészségügyi Tudományos Tanács -  
Klinikai Farmakológiai Etikai Bizottság,  
Arany János utca 6-8, Budapest, Hungary  
1051

Chairperson: Zsuzsanna Füst, MD, Prof.

Local: N/A

---

Remenyik, Eva, MD, PhD

Central: Egészségügyi Tudományos Tanács -  
Klinikai Farmakológiai Etikai Bizottság,  
Arany János utca 6-8, Budapest, Hungary  
1051

Chairperson: Zsuzsanna Füst, MD, Prof.

Local: N/A

---

**Latvia**

---

Krastins, Ivars, MD

Central: Ethics Committee for Clinical Research at  
Development Society of Pauls Stradins  
Clinical University Hospital, Pilsonu Street  
13, Riga, Latvia LV-1002,

Chairperson: Peteris Stradins

Local: N/A

---

Krievins, Dainis, Prof.

Central: Ethics Committee for Clinical Research at  
Development Society of Pauls Stradins  
Clinical University Hospital, Pilsonu Street  
13, Riga, Latvia LV-1002,

Chairperson: Peteris Stradins

Local: N/A

---

|                                    |                                                                                                                                                                                                                                                                                                                                                                                                                                                                                     |
|------------------------------------|-------------------------------------------------------------------------------------------------------------------------------------------------------------------------------------------------------------------------------------------------------------------------------------------------------------------------------------------------------------------------------------------------------------------------------------------------------------------------------------|
| Miscuks, Jurijs, MD                | <p>Central: Ethics Committee for Clinical Research at Development Society of Pauls Stradins Clinical University Hospital, Pilsonu Street 13, Riga, Latvia LV-1002,</p> <p>Chairperson: Peteris Stradins</p> <p>Local: N/A</p>                                                                                                                                                                                                                                                       |
| Novikovs, Nikolajs, MD             | <p>Central: Ethics Committee for Clinical Research at Development Society of Pauls Stradins Clinical University Hospital, Pilsonu Street 13, Riga, Latvia LV-1002,</p> <p>Chairperson: Peteris Stradins</p> <p>Local: N/A</p>                                                                                                                                                                                                                                                       |
| Plaudis, Haralds, MD, Assoc. Prof. | <p>Central: Ethics Committee for Clinical Research at Development Society of Pauls Stradins Clinical University Hospital, Pilsonu Street 13, Riga, Latvia LV-1002,</p> <p>Chairperson: Peteris Stradins</p> <p>Local: N/A</p>                                                                                                                                                                                                                                                       |
| <b>Romania</b>                     |                                                                                                                                                                                                                                                                                                                                                                                                                                                                                     |
| Georgescu, Simona Roxana, Prof.    | <p>Central: The National Bioethics Commission for Medicines and Medical Devices, 19-21 Stefan cel Mare St., Sector 2, 020125 (Precint of Colentina Hospital, Pavilion K), Bucharest, Romania</p> <p>Chairperson: Dinu Antonescu, Prof</p> <p>Local: N/A</p>                                                                                                                                                                                                                         |
| Giuglea, Carmen, MD                | <p>Central: The National Bioethics Commission for Medicines and Medical Devices, 19-21 Stefan cel Mare St., Sector 2, 020125 (Precint of Colentina Hospital, Pavilion K), Bucharest, Romania</p> <p>Chairperson: Dinu Antonescu, Prof</p> <p>Local: Local Ethics Commission of the "Sf. Ioan" Clinical Emergency Hospital, Plastic and Reconstructive surgery dept, 13 Vitan Barzesti St., Sector 4, 042122, Bucharest, Romania</p> <p>Chairperson: Nicolae Iordache, MD, Prof.</p> |

|                             |                                                                                                                                                                                                                                                             |
|-----------------------------|-------------------------------------------------------------------------------------------------------------------------------------------------------------------------------------------------------------------------------------------------------------|
| Marinescu, Silviu, MD       | <p>Central: The National Bioethics Commission for Medicines and Medical Devices, 19-21 Stefan cel Mare St., Sector 2, 020125 (Precint of Colentina Hospital, Pavilion K), Bucharest, Romania</p> <p>Chairperson: Dinu Antonescu, Prof</p> <p>Local: N/A</p> |
| Orasan, Remus, Prof.        | <p>Central: The National Bioethics Commission for Medicines and Medical Devices, 19-21 Stefan cel Mare St., Sector 2, 020125 (Precint of Colentina Hospital, Pavilion K), Bucharest, Romania</p> <p>Chairperson: Dinu Antonescu, Prof</p> <p>Local: N/A</p> |
| <b>Russia</b>               |                                                                                                                                                                                                                                                             |
| Abramov, Igor, MD, Prof.    | <p>Central: N/A</p> <p>Local: Local Ethics Committee of City Clinical Hospital#15 n.a. O.M. Filatov<br/>23 Veshnyakovskaya str.<br/>Moscow, Russia 111539</p> <p>Chairperson: Yury Nikiforov</p>                                                            |
| Apartsin, Konstantin, Prof. | <p>Central: N/A</p> <p>Local: Local Ethics Committee of State Budgetary Healthcare Institution, Irkutsk “Respect Sign Awarded” Regional Clinical Hospital, Yubileiny district 100 Irkutsk, Russia 664079</p> <p>Chairperson: Victor Shanturov</p>           |
| Goryunov, Sergey, MD        | <p>Central: N/A</p> <p>Local: Local Ethics Committee of City Clinical Hospital#15 n.a. O.M. Filatov,<br/>23 Veshnyakovskaya str.<br/>Moscow, Russia 111539</p> <p>Chairperson: Yury Nikiforov</p>                                                           |
| Kokorin, Kirill, MD         | <p>Central: N/A</p> <p>Local: Local Ethics Committee of City Hospital #14,” 19, Kosinova str.<br/>Saint-Petersburg, Russia 198099,</p> <p>Chairperson: Valery Srabionov</p>                                                                                 |

|                                  |                                                                                                                                                                                                                   |
|----------------------------------|-------------------------------------------------------------------------------------------------------------------------------------------------------------------------------------------------------------------|
| Lenskaya, Liudmila, MD           | <p>Central: N/A</p> <p>Local: Local Ethics Committee of Tomsk Regional Clinical Hospital 96, Ivana hernych str. Tomsk, Russia 634063</p> <p>Chairperson: Georgiy E. Chernogoryuk</p>                              |
| Matevosyan, Elena, MD            | <p>Central: N/A</p> <p>Local: Local Ethics Committee of Vsevolozhsk Clinical Interdistrict Hospital, 20 Koltushskoe shosse, Vsevolozhsk, Leningrad Region, Russia 188643</p> <p>Chairperson: Natalia Kulikova</p> |
| Shpagina, Lubov, MD, Prof.       | <p>Central: N/A</p> <p>Local: Local Ethics Committee of City Clinical Hospital #2, 21 Polzunova str., Novosibirsk, Russia 634063</p> <p>Chairperson: Victor V. Rybin</p>                                          |
| <b>Serbia</b>                    |                                                                                                                                                                                                                   |
| Djordjevic, Mirjana Aleksic, MD  | <p>Central: N/A</p> <p>Local: Ethics Committee of Clinical Center of Vojvodina, Hajduk Veljkova 1-9, Novi Sad, Serbia 21000</p> <p>Chairperson: Ivan Levakov, MD, PhD, Assoc. Prof.</p>                           |
| Dulovic, Olga, MD, Prof.         | <p>Central: N/A</p> <p>Local: Ethics Committee of Clinical Center of Serbia, Pasterova 2, Belgrade, Serbia 11000</p> <p>Chairperson: Branislav Stefanovic, MD, PhD, Prof.</p>                                     |
| Karanikolic, Aleksandar, MD, PhD | <p>Central: N/A</p> <p>Local: Ethics Committee of Clinical Center Nis, Bulevar dr Zorana Djinjdjica 48, Nis, Serbia 18000</p> <p>Chairperson: Steva Stanisic, MD</p>                                              |
| Kovacevic, Bojan, MD, Prof.      | <p>Central: N/A</p> <p>Local: Ethics Committee of Clinical Hospital Center Zvezdara, Dimitrija Tucovica 161, Belgrade, Serbia 11000</p> <p>Chairperson: Milica Dekleva, MD, PhD, Assoc. Prof.</p>                 |

---

**South Africa**

---

|                            |                                                                                                                                                                                                                                                                                               |
|----------------------------|-----------------------------------------------------------------------------------------------------------------------------------------------------------------------------------------------------------------------------------------------------------------------------------------------|
| De Jong, Douwe Marcus, MD  | Central: Pharma Ethics (Pty) LTD,<br>123 Amcor Road, Lyttelton,<br>Centurion, Gauteng, South Africa 0157<br>Chairperson: C.S.J Duvenage, MBChB, FCP                                                                                                                                           |
| Dindar, Fareed Sullman, MD | Central: Pharma Ethics (Pty) LTD,<br>123 Amcor Road, Lyttelton,<br>Centurion, Gauteng, South Africa 0157<br>Chairperson: C.S.J Duvenage, MBChB, FCP                                                                                                                                           |
| Du Plessis, Herman, MD     | Central: University of Pretoria, Faculty of Health<br>Sciences Research Ethics committee, HW<br>Snyman South Building, Rooms 2.33, 2.34<br>and 2.35, 31 Bophelo Road, Gezina,<br>Pretoria, Gauteng, South Africa 0084<br>Chairperson: Prof CW van Staden, MBChB, MMed,<br>MD, FCP, FTCL, UPLM |
| Fourie, Jan, MD            | Central: Pharma Ethics (Pty) LTD,<br>123 Amcor Road, Lyttelton,<br>Centurion, Gauteng, South Africa 0157<br>Chairperson: C.S.J Duvenage, MBChB, FCP                                                                                                                                           |
| Gani, Mashra, MD           | Central: Pharma Ethics (Pty) LTD,<br>123 Amcor Road, Lyttelton,<br>Centurion, Gauteng, South Africa 0157<br>Chairperson: C.S.J Duvenage, MBChB, FCP                                                                                                                                           |
| Mitha, Essack, MD          | Central: Pharma Ethics (Pty) LTD,<br>123 Amcor Road, Lyttelton,<br>Centurion, Gauteng, South Africa 0157<br>Chairperson: C.S.J Duvenage, MBChB, FCP                                                                                                                                           |
| Nel, Jeanne, MD            | Central: Pharma Ethics (Pty) LTD,<br>123 Amcor Road, Lyttelton,<br>Centurion, Gauteng, South Africa 0157<br>Chairperson: C.S.J Duvenage, MBChB, FCP                                                                                                                                           |
| Tayob, Mohammed, MD        | Central: Pharma Ethics (Pty) LTD,<br>123 Amcor Road, Lyttelton,<br>Centurion, Gauteng, South Africa 0157<br>Chairperson: C.S.J Duvenage, MBChB, FCP                                                                                                                                           |

---

|                               |                                                                                                                                                                                                              |
|-------------------------------|--------------------------------------------------------------------------------------------------------------------------------------------------------------------------------------------------------------|
| Van Aswegen, Dina Johanna, MD | Central: Pharma Ethics (Pty) LTD,<br>123 Amcor Road, Lyttelton,<br>Centurion, Gauteng, South Africa 0157<br>Chairperson: C.S.J Duvenage, MBChB, FCP                                                          |
| Van Dyk, Christo, MD          | Central: Pharma Ethics (Pty) LTD,<br>123 Amcor Road, Lyttelton,<br>Centurion, Gauteng, South Africa 0157<br>Chairperson: C.S.J Duvenage, MBChB, FCP                                                          |
| <b>Ukraine</b>                |                                                                                                                                                                                                              |
| Barvinska, Anna, MD           | Central: N/A<br>Local: Ethics Committee of Municipal City Clinical<br>Emergency Hospital, 9 I. Mykolaychuk Str.,<br>Lviv, 79059, Ukraine<br>Chairperson: Sergii Fedorenko                                    |
| Datsenko, Oleksiy, MD         | Central: N/A<br>Local: Ethics Committee of Municipal Institution of<br>Public Health "Kharkiv City Clinical<br>Hospital #2," 197 Moskovskyy Ave,<br>Kharkiv, 61037, Ukraine<br>Chairperson: Yury Gvozdyk     |
| Kosulnykov, Sergii, MD        | Central: N/A<br>Local: Ethics Committee of MI "Dnipropetrovsk<br>Regional Clinical Hospital named after I. I.<br>Mechnikov," 14 Zhovtneva sq.,<br>Dnipropetrovsk, 49005, Ukraine<br>Chairperson: Olena Gavva |
| Pyptiuk, Oleksandr, MD, Prof. | Central: N/A<br>Local: Ethics Committee of Ivano-Frankivsk Central<br>City Clinical Hospital, 114 Hetmana Mazepy<br>Str., Ivano-Frankivsk, 76025, Ukraine<br>Chairperson: Oleg Tsikhon                       |
| Shapoval, Sergiy, MD, Prof.   | Central: N/A<br>Local: Ethics Committee of Municipal Institution<br>"City Clinical Hospital #3," 9 Metalurhiv<br>Ave, Zaporizhzhya, 69032, Ukraine<br>Chairperson: Alla Pashkova                             |

|                         |                                                                                                                                                                                                                     |
|-------------------------|---------------------------------------------------------------------------------------------------------------------------------------------------------------------------------------------------------------------|
| Shevchenko, Vadym, MD   | Central: N/A<br>Local: Ethics Committee of Municipal Institution<br>“Cherkasy Regional Hospital of Cherkasy<br>Regional Council,” 3 Mendeleyeva Str,<br>Cherkasy, 18009, Ukraine<br>Chairperson: Tetiana Bilonogova |
| Vasylyuk, Sergiy, MD    | Central: N/A<br>Local: Ethics Committee of Ivano-Frankivsk City<br>Clinical Hospital #1, 34 Mateiky St, Ivano-<br>Frankivsk, 76012, Ukraine<br>Chairperson: Iaroslav Kobyliak                                       |
| <b>United States</b>    |                                                                                                                                                                                                                     |
| Dar, Sadia, MD          | Central: Quorum Review IRB, 1501 Fourth<br>Avenue, Suite 800, Seattle, WA 98101<br>Chairperson: Stephen Rosenfeld, MD<br>Local: NA                                                                                  |
| Eyzaguirre, Robert, MD  | Central: Quorum Review IRB, 1501 Fourth<br>Avenue, Suite 800, Seattle, WA 98101<br>Chairperson: Stephen Rosenfeld, MD<br>Local: NA                                                                                  |
| Farley, Brett, MD       | Central: Quorum Review IRB, 1501 Fourth<br>Avenue, Suite 800, Seattle, WA 98101<br>Chairperson: Stephen Rosenfeld, MD<br>Local: NA                                                                                  |
| Friedman, Bruce, MD     | Central: Quorum Review IRB, 1501 Fourth<br>Avenue, Suite 800, Seattle, WA 98101<br>Chairperson: Stephen Rosenfeld, MD<br>Local: NA                                                                                  |
| Giordano, Philip A., MD | Central: NA<br>Local: Orlando Health, 1414 Kuhl Avenue, Orlando,<br>FL 32806<br>Chairperson: John Promes                                                                                                            |
| Green, Sinikka, MD      | Central: NA<br>Local: Sharp Healthcare Institutional Review Board,<br>8695 Spectrum Center Blvd, San Diego, CA<br>92123<br>Chairperson: David J Bodkin, MD                                                          |

|                                   |                                                                                                                                                     |
|-----------------------------------|-----------------------------------------------------------------------------------------------------------------------------------------------------|
| Heller, Barry, MD                 | Central: Quorum Review IRB, 1501 Fourth Avenue, Suite 800, Seattle, WA 98101<br>Chairperson: Stephen Rosenfeld, MD<br>Local: NA                     |
| Jauregui-Peredo, Luis Ernesto, MD | Central: NA<br>Local: Mercy St. Vincent Medical Center, 2213 Cherry Street, Toledo, Ohio 43608<br>Chairperson: Pamela J Otis, MD                    |
| Kabler, Heidi, MD                 | Central: NA<br>Local: Sunrise Health IRB, 3186 South Maryland Parkway, Las Vegas, NV 89109<br>Chairperson: M. Gabriella Gregory, MD                 |
| Keech, Richard, MD                | Central: Quorum Review IRB, 1501 Fourth Avenue, Suite 800, Seattle, WA 98101<br>Chairperson: Stephen Rosenfeld, MD<br>Local: NA                     |
| Kingsley, Jeffrey, DO             | Central: Quorum Review IRB, 1501 Fourth Avenue, Suite 800, Seattle, WA 98101<br>Chairperson: Stephen Rosenfeld, MD<br>Local: NA                     |
| Lee, Patrick , MD                 | Central: NA<br>Local: Baystate Health, 759 Chesnut Street, Springfield, MA 01199<br>Chairperson: Karen Christianson                                 |
| Manos, Paul, MD                   | Central: Quorum Review IRB, 1501 Fourth Avenue, Suite 800, Seattle, WA 98101<br>Chairperson: Stephen Rosenfeld, MD<br>Local: NA                     |
| May, Larissa , MD                 | Central: NA<br>Local: Western Institutional Review Board, 1019 39 <sup>th</sup> Avenue Suite 120 Puyallup, WA 98374<br>Chairperson: R. Bert Wilkins |



|                          |                                                                                                                                                                                     |
|--------------------------|-------------------------------------------------------------------------------------------------------------------------------------------------------------------------------------|
| Moran, Gregory John , MD | <p>Central: NA</p> <p>Local: Olive View UCLA Education Research Institute, 14445 Olive View Drive, Symar, CA 91342</p> <p>Chairperson: Anthony Shaw, MD</p>                         |
| Morrow, Lee, MD          | <p>Central: NA</p> <p>Local: Creighton University Biomedical Institutional Review Board, 2500 California Plaza, Omaha, NE 68178</p> <p>Chairperson: Mary Kuhns- Connell, RN PhD</p> |
| O'Mara, Steven, MD       | <p>Central: NA</p> <p>Local: Jackson Hospital, 1725 Pine Street Montgomery, AL 36106</p> <p>Chairperson: Raghu Mukkamala, MD</p>                                                    |
| Overcash, Scott, MD      | <p>Central: NA</p> <p>Local: Sharp Healthcare Institutional Review Board, 8695 Spectrum Center Blvd, San Diego, CA 92123</p> <p>Chairperson: David J. Bodkin, MD</p>                |
| Pullman, John, MD        | <p>Central: Quorum Review IRB, 1501 Fourth Avenue, Suite 800, Seattle, WA 98101</p> <p>Chairperson: Stephen Rosenfeld, MD</p> <p>Local: NA</p>                                      |
| Rives, Peter, MD         | <p>Central: Quorum Review IRB, 1501 Fourth Avenue, Suite 800, Seattle, WA 98101</p> <p>Chairperson: Stephen Rosenfeld, MD</p> <p>Local: NA</p>                                      |
| Shah, Sanjay, MD         | <p>Central: Quorum Review IRB, 1501 Fourth Avenue, Suite 800, Seattle, WA 98101</p> <p>Chairperson: Stephen Rosenfeld, MD</p> <p>Local: NA</p>                                      |
| Shah, Shaukat, MD        | <p>Central: Quorum Review IRB, 1501 Fourth Avenue, Suite 800, Seattle, WA 98101</p> <p>Chairperson: Stephen Rosenfeld, MD</p> <p>Local: NA</p>                                      |

---

Slandzicki, Alex, MD

Central: Quorum Review IRB, 1501 Fourth  
Avenue, Suite 800, Seattle, WA 98101

Chairperson: Stephen Rosenfeld, MD

Local: NA

---

Ware, David, MD

Central: Quorum Review IRB, 1501 Fourth  
Avenue, Suite 800, Seattle, WA 98101

Chairperson: Stephen Rosenfeld, MD

Local: NA

---

Zervos, Marcus, MD

Central: NA

Local: Henry Ford Health System Institutional  
Review Board, 2799 West Grand Blvd, CFP  
Basement Room 46,  
Detroit, MI 48202

Chairperson: Timothy Roehrs, PhD

---
